# Supplementary material for: Marginal Distribution Fitting Method for Modelling Flood Extremes on a River Network
Source: MDPI journal article supplement (doi:10.3390/geohazards4040030), 2023-12-16
Supplement: s1 [file s1]

**Mean Daily Discharge Station: 7064300**

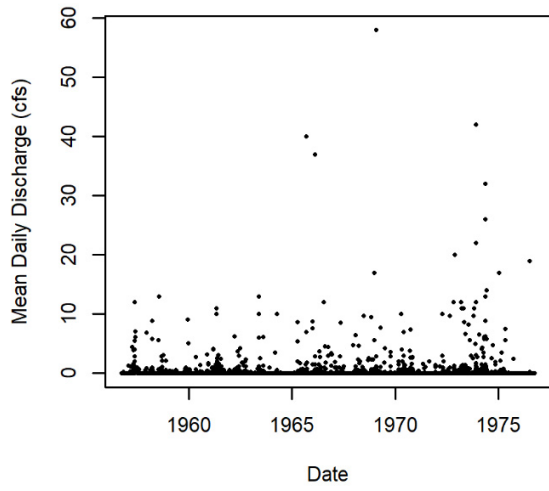

**Mean Daily Discharge Station: 7064440**

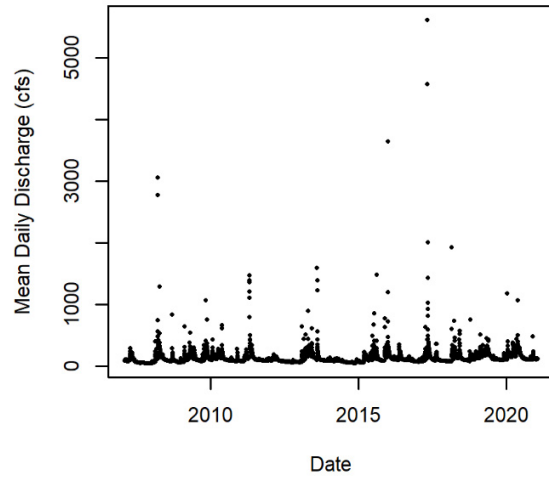

**Mean Daily Discharge Station: 7064500**

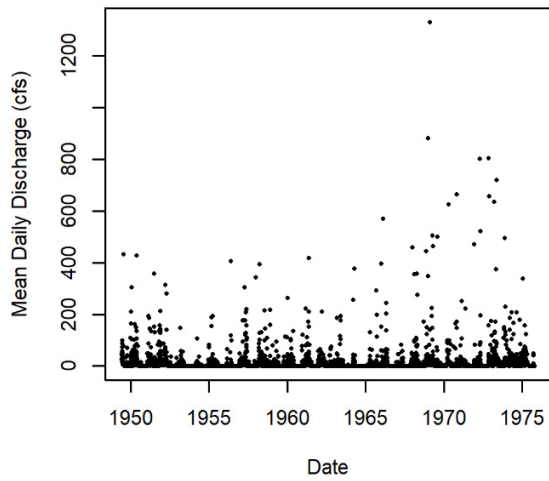

**Mean Daily Discharge Station: 7064533**

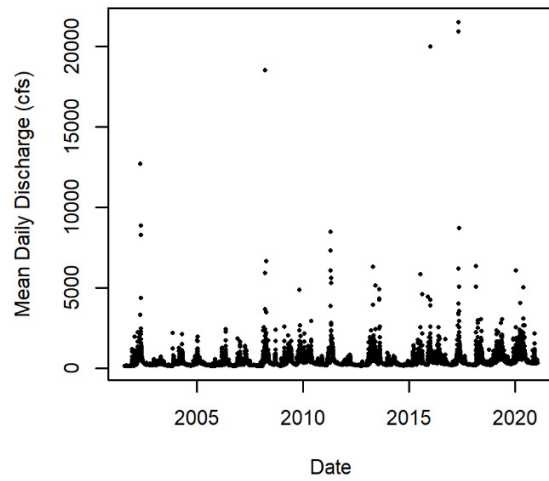

**Mean Daily Discharge Station: 7065200**

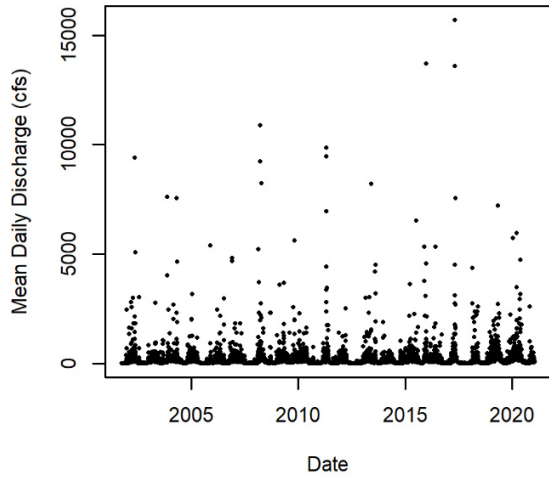

**Mean Daily Discharge Station: 7065495**

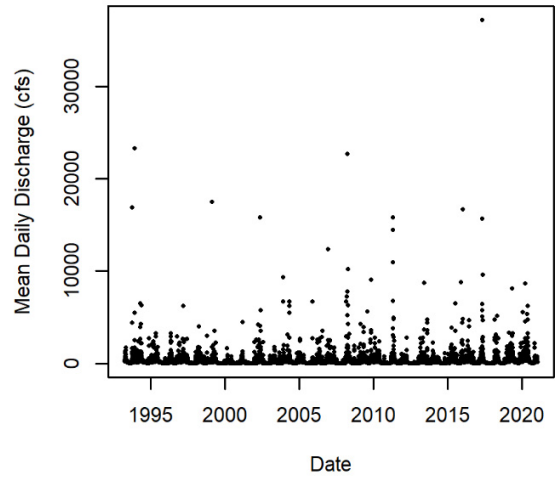

**Mean Daily Discharge Station: 7066000**

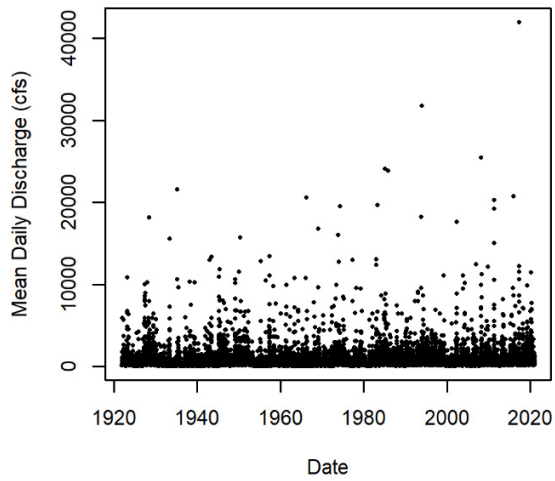

**Mean Daily Discharge Station: 7066500**

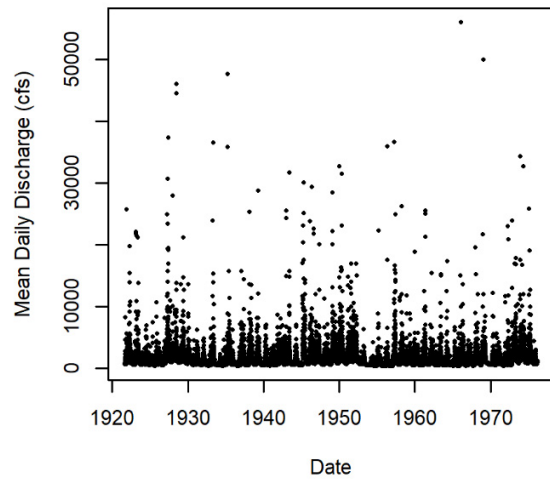

**Mean Daily Discharge Station: 7067000**

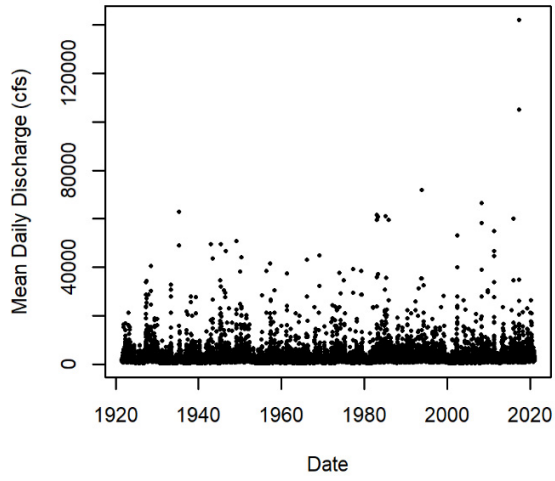

**Mean Daily Discharge Station: 7068000**

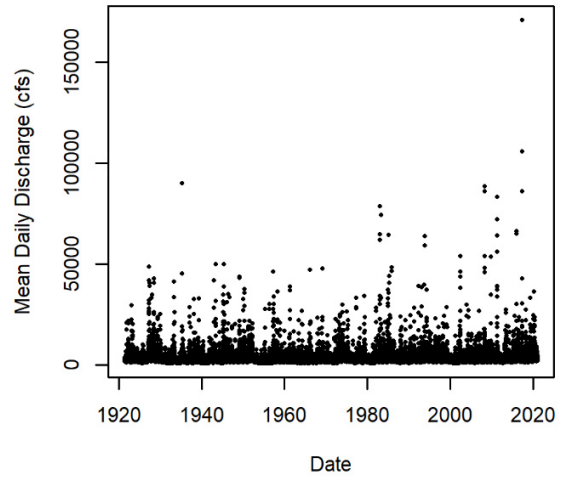

**Mean Daily Discharge Station: 7069220**

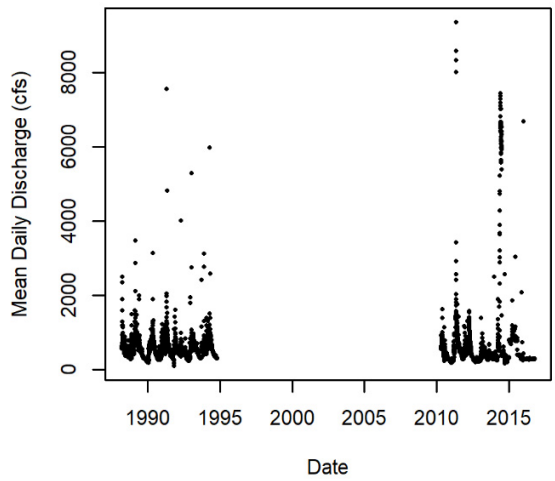

**Mean Daily Discharge Station: 7069295**

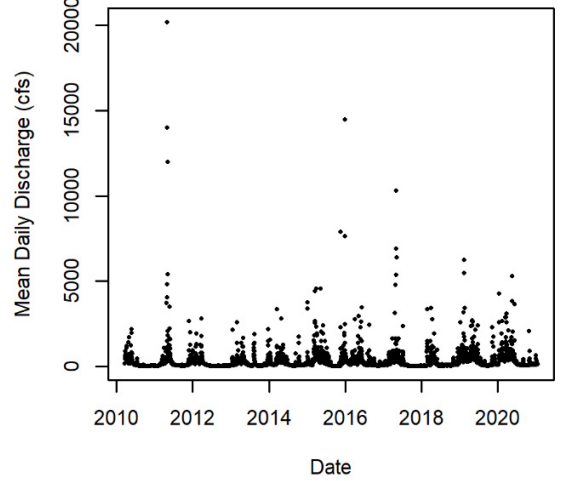

Mean Daily Discharge Station: 7069305

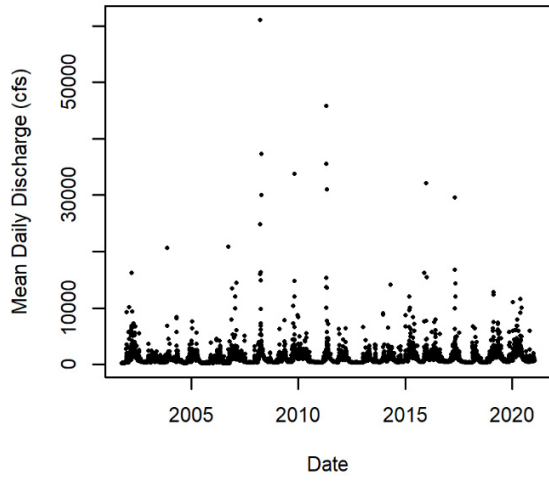

Mean Daily Discharge Station: 7069500

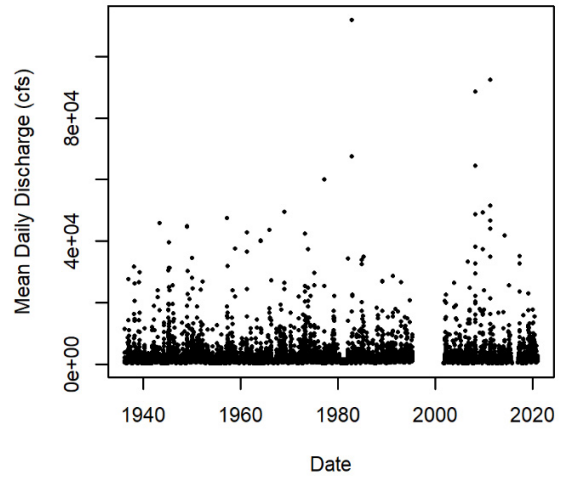

Mean Daily Discharge Station: 7070000

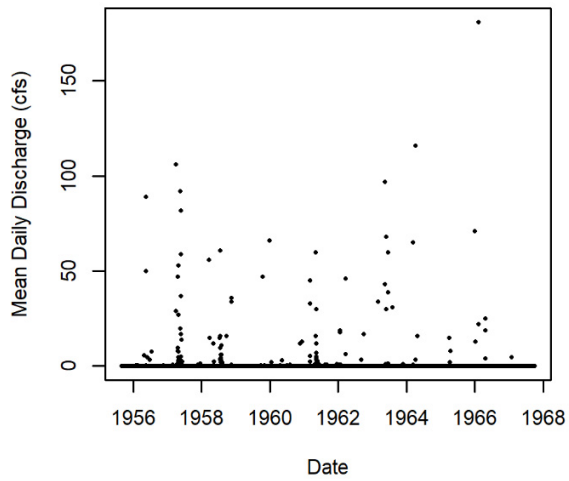

Mean Daily Discharge Station: 7070500

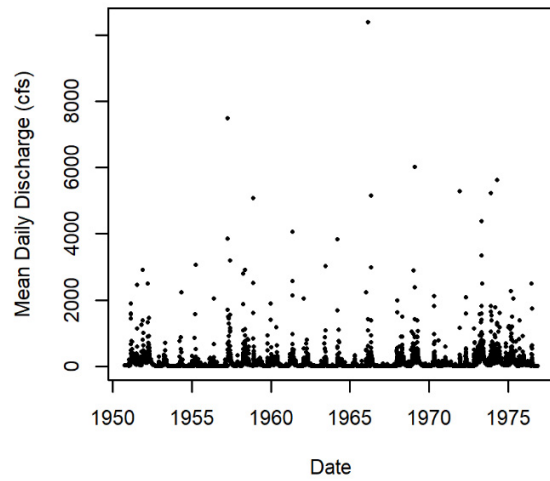



**Mean Daily Discharge Station: 7071500**

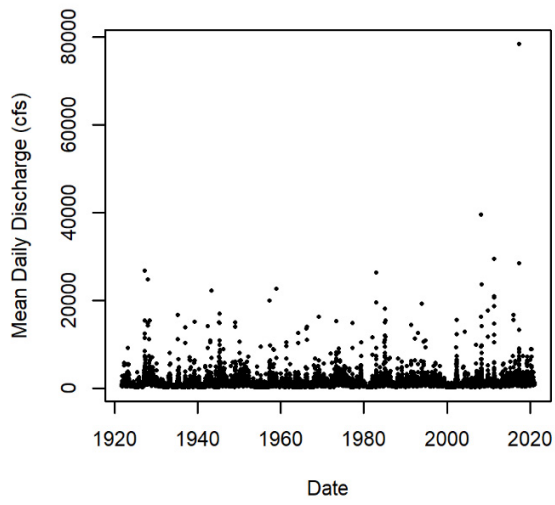

**Mean Daily Discharge Station: 7072000**

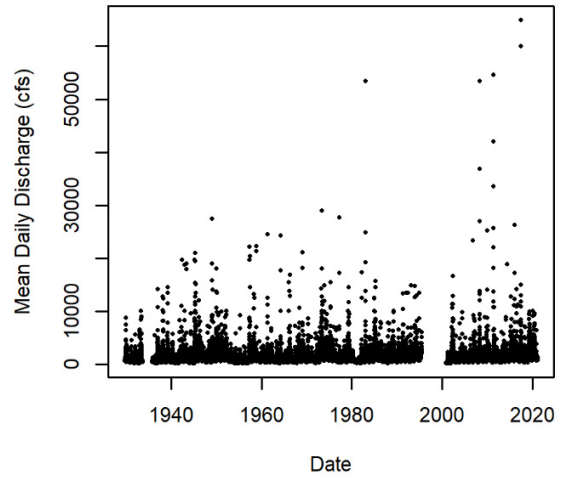

**Mean Daily Discharge Station: 7073000**

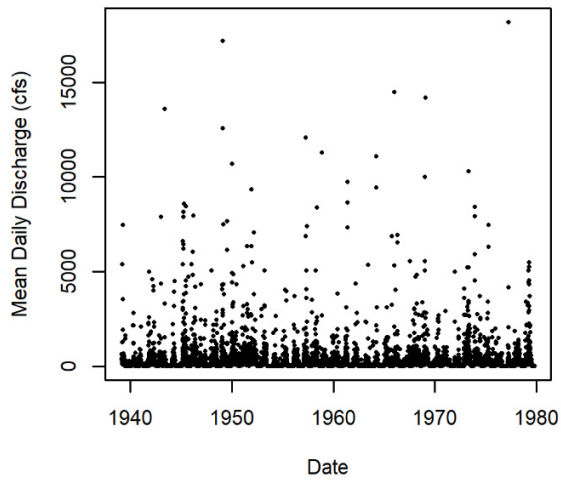

**Mean Daily Discharge Station: 7073500**

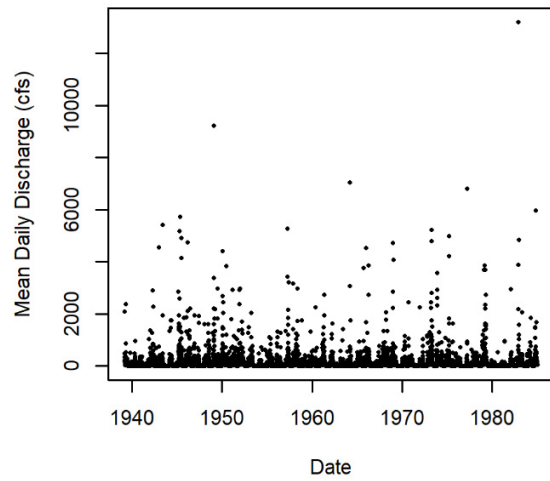

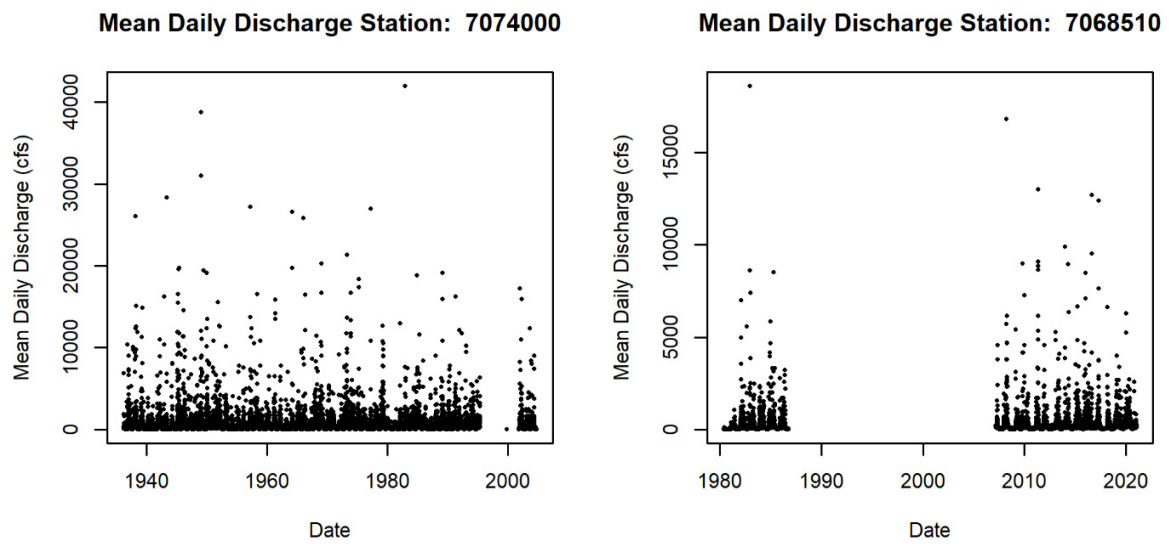

Figure S1. Mean Daily Discharge Data at each of the 22 stations.

**Mean Daily Discharge Station: 7064300**

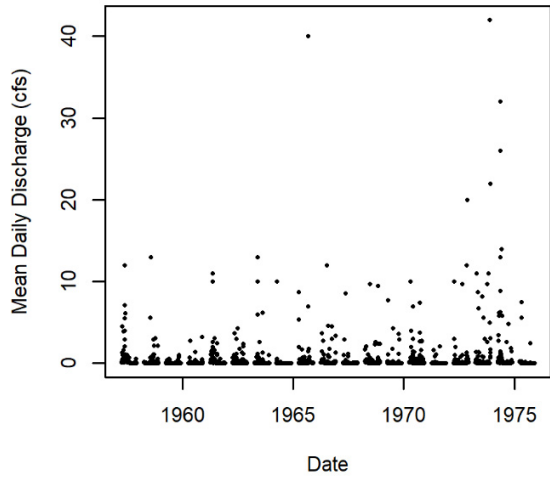

**Mean Daily Discharge Station: 7064440**

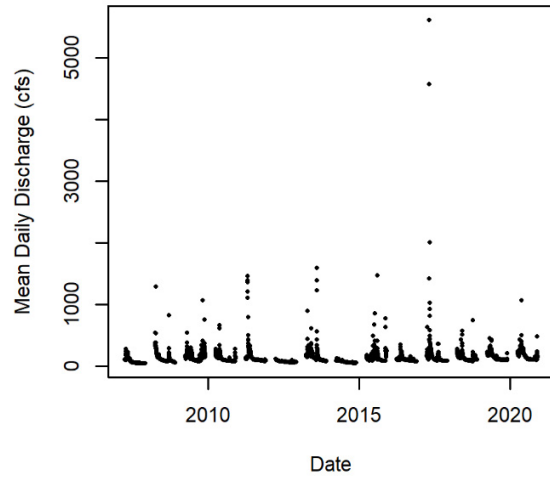

**Mean Daily Discharge Station: 7064500**

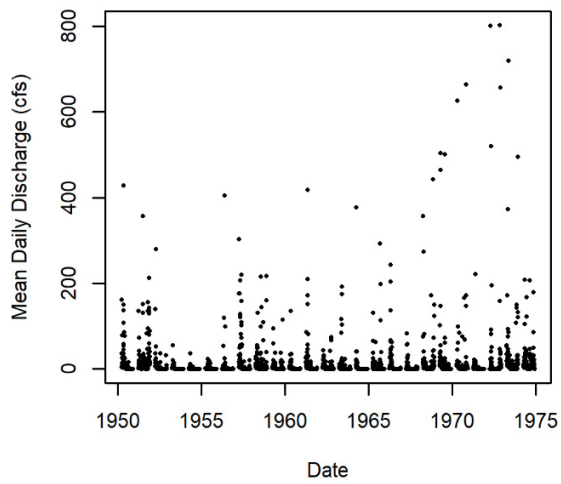

**Mean Daily Discharge Station: 7064533**

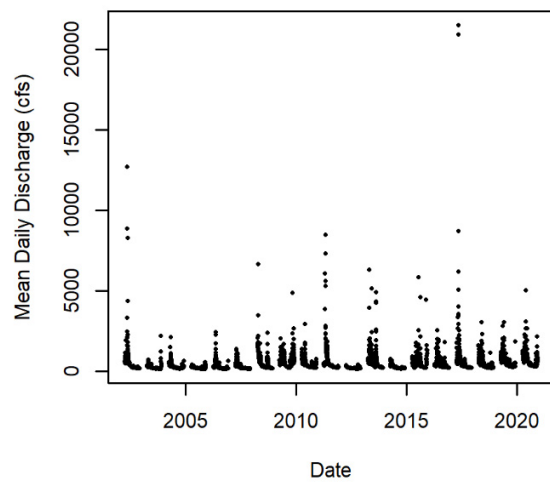

**Mean Daily Discharge Station: 7065200**

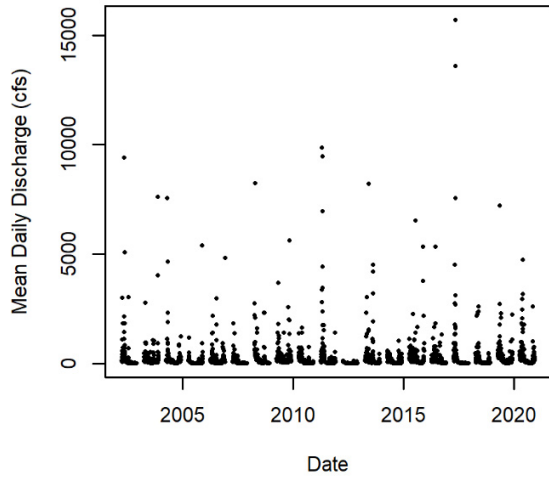

**Mean Daily Discharge Station: 7065495**

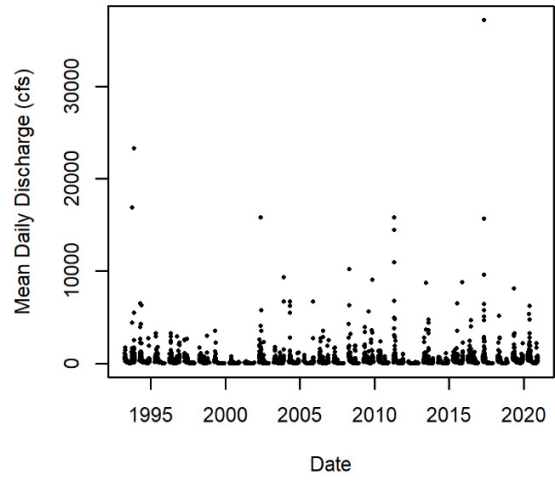

**Mean Daily Discharge Station: 7066000**

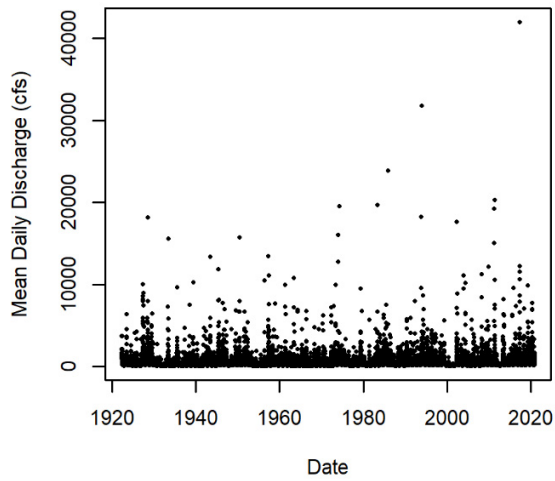

**Mean Daily Discharge Station: 7066500**

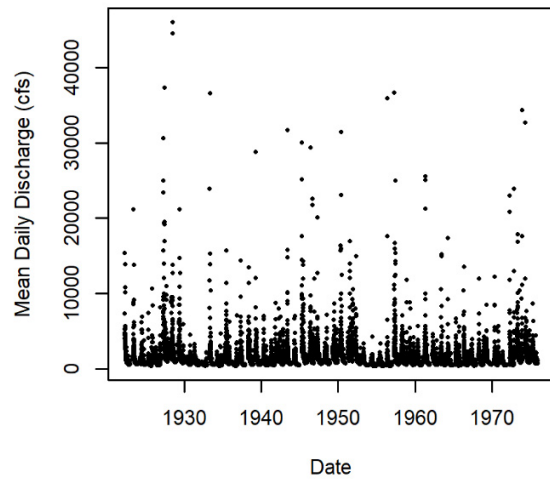

**Mean Daily Discharge Station: 7067000**

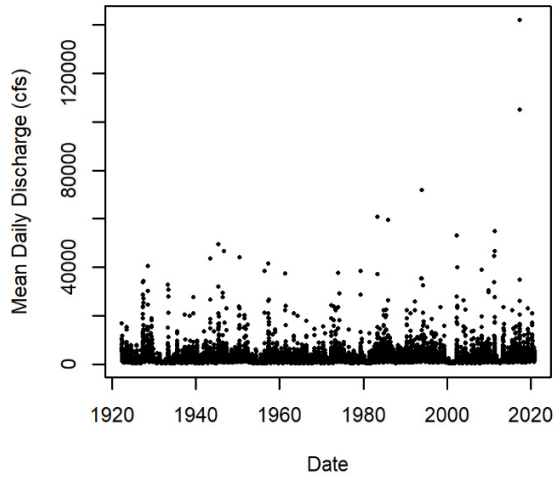

**Mean Daily Discharge Station: 7068000**

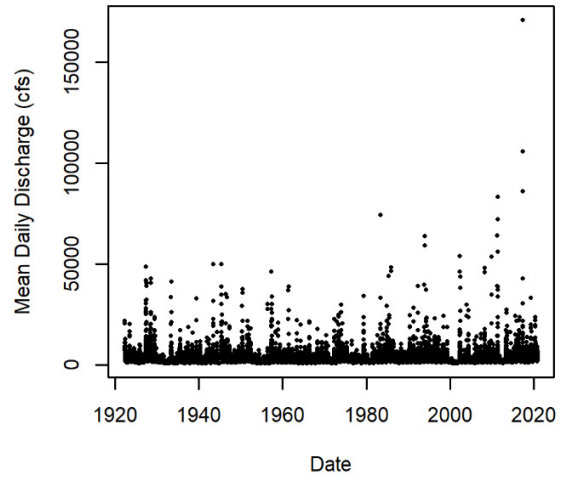

**Mean Daily Discharge Station: 7069220**

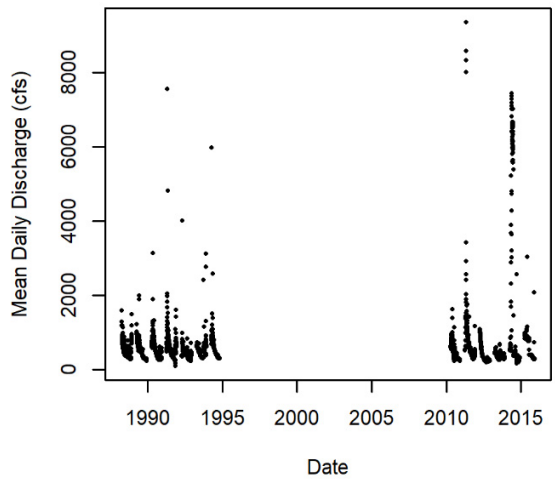

**Mean Daily Discharge Station: 7069295**

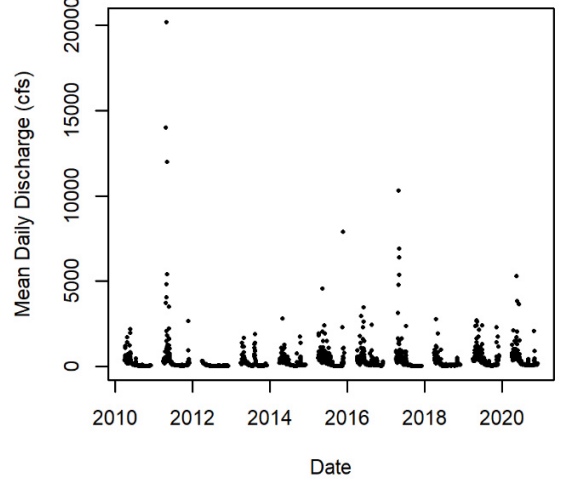

**Mean Daily Discharge Station: 7069305**

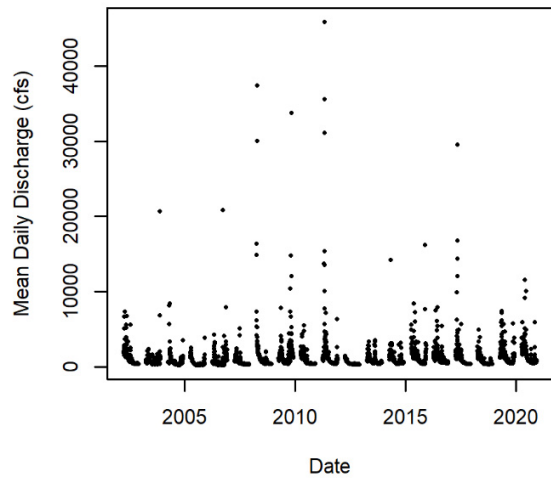

**Mean Daily Discharge Station: 7069500**

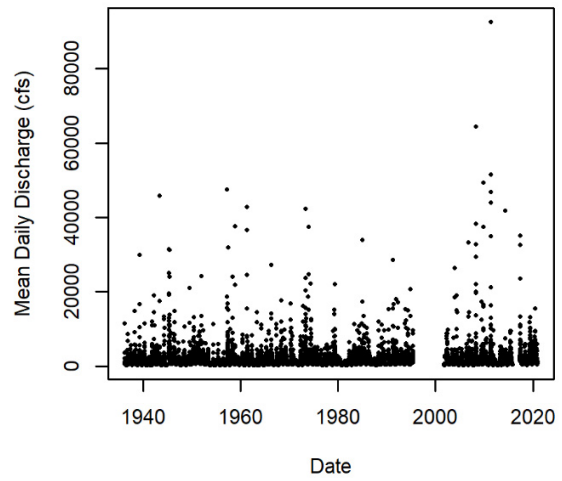

**Mean Daily Discharge Station: 7070000**

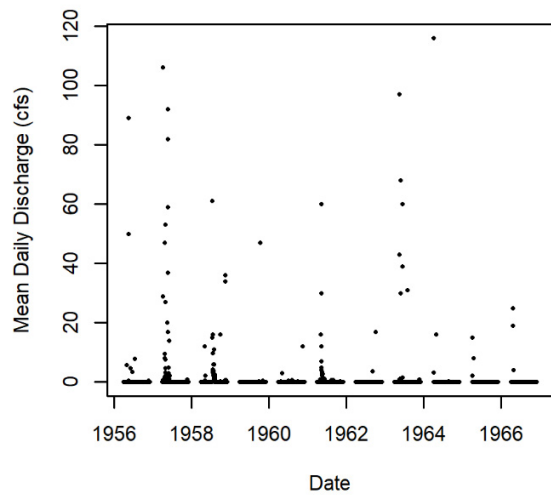

**Mean Daily Discharge Station: 7070500**

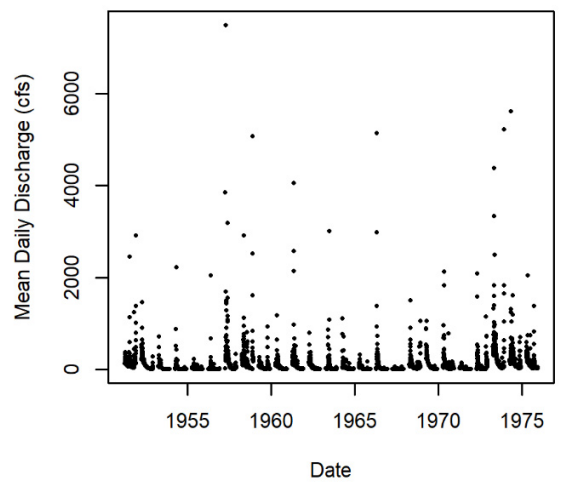

**Mean Daily Discharge Station: 7071500**

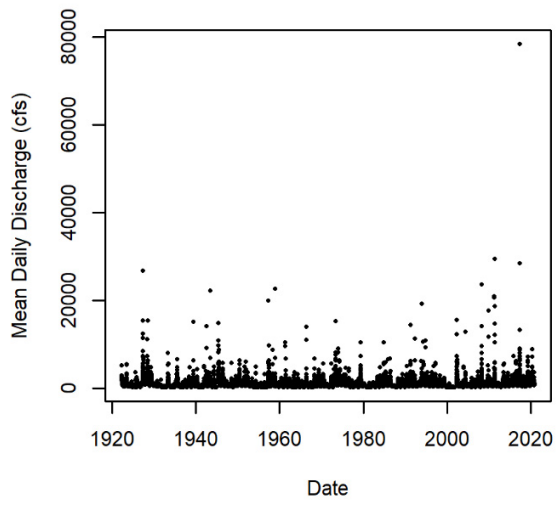

**Mean Daily Discharge Station: 7072000**

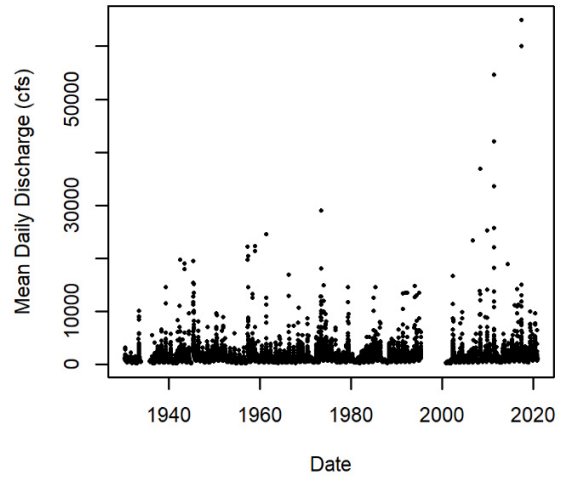

**Mean Daily Discharge Station: 7073000**

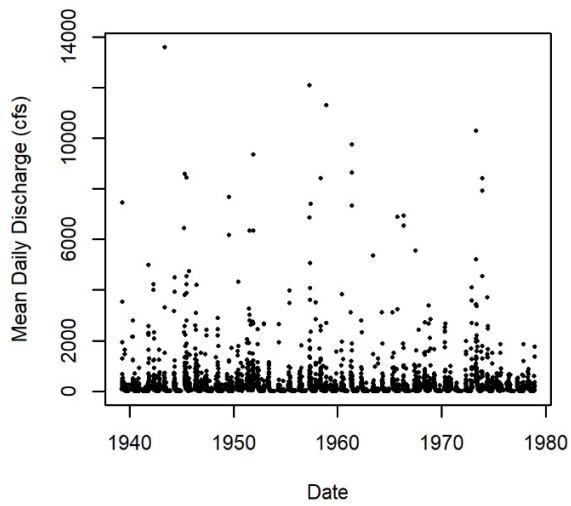

**Mean Daily Discharge Station: 7073500**

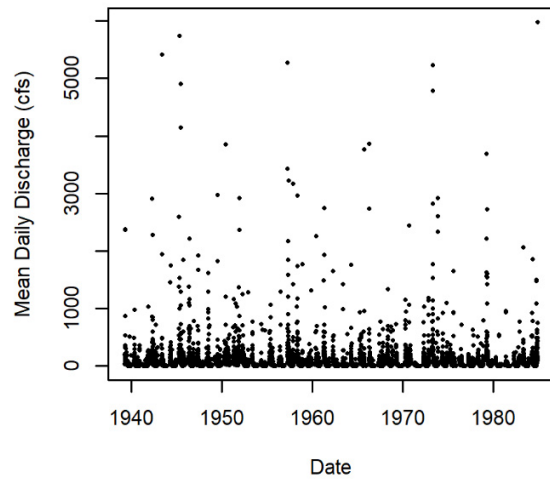

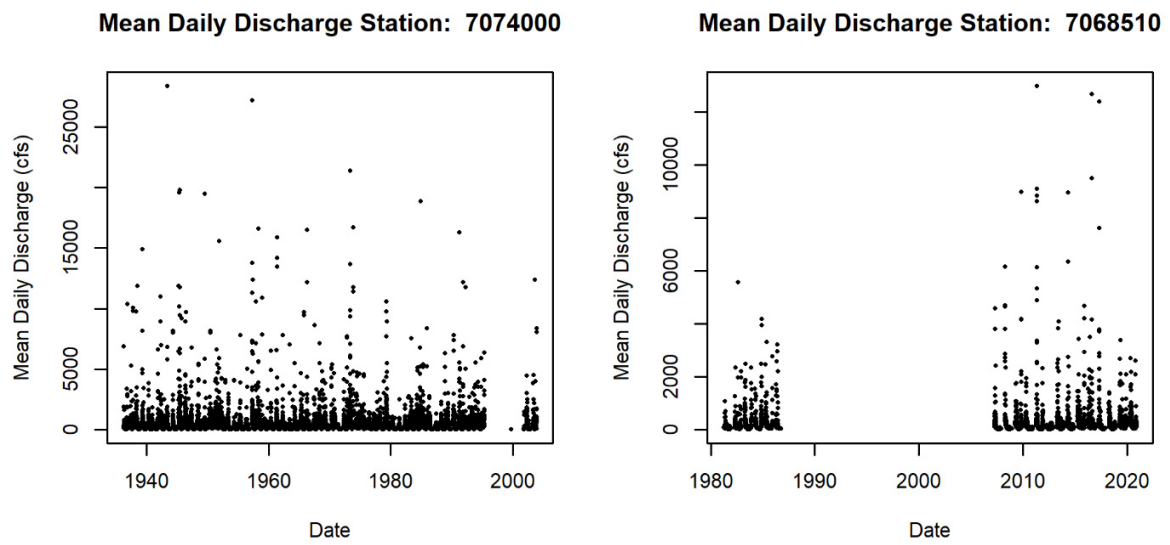

Figure S2. April - November Mean Daily Discharge Data at each of the 22 stations.



**Seasonal Maximum Discharge**  
**Station: 7064300**

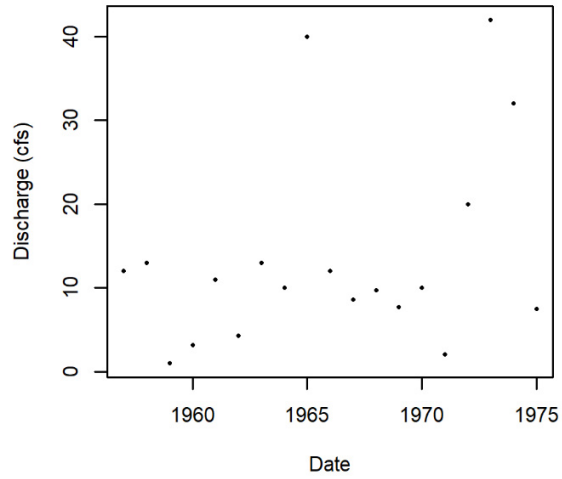

**Seasonal Maximum Discharge**  
**Station: 7064440**

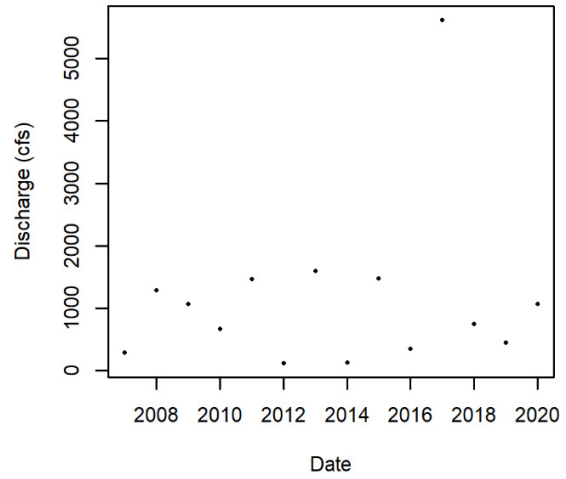

**Seasonal Maximum Discharge**  
**Station: 7064500**

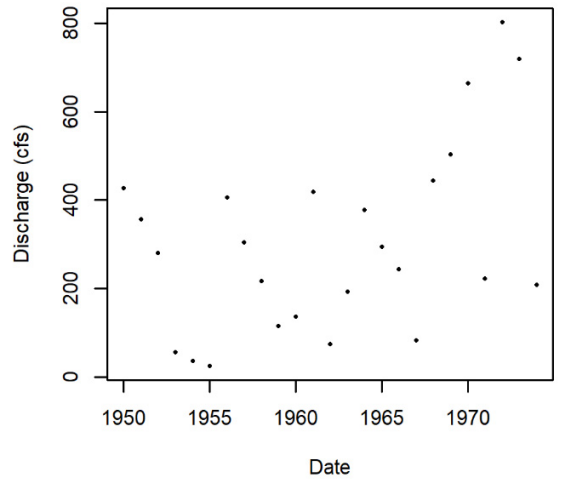

**Seasonal Maximum Discharge**  
**Station: 7064533**

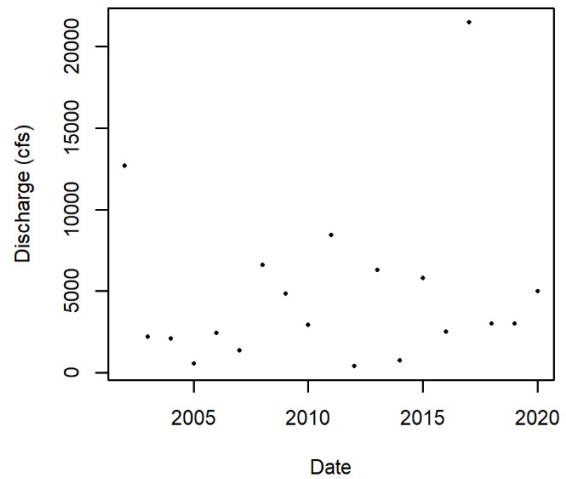

**Seasonal Maximum Discharge**  
**Station: 7065200**

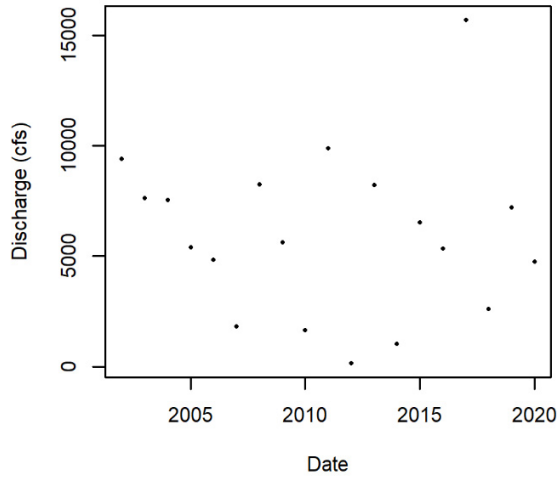

**Seasonal Maximum Discharge**  
**Station: 7065495**

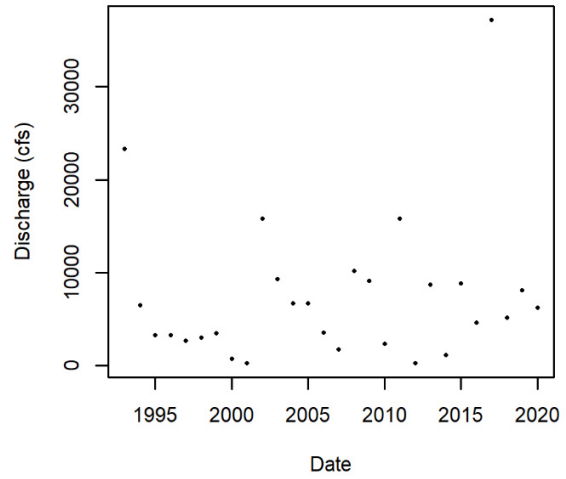

**Seasonal Maximum Discharge**  
**Station: 7066000**

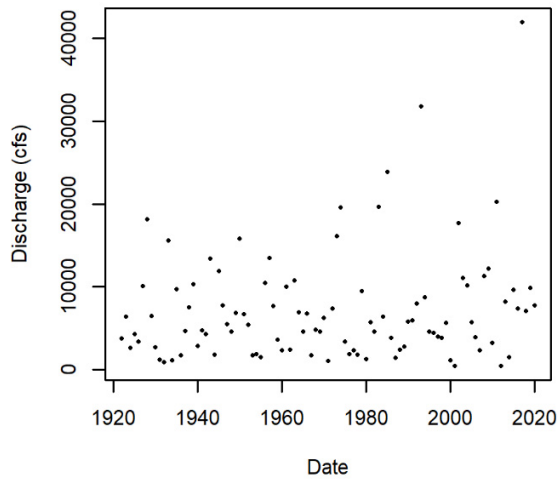

**Seasonal Maximum Discharge**  
**Station: 7066500**

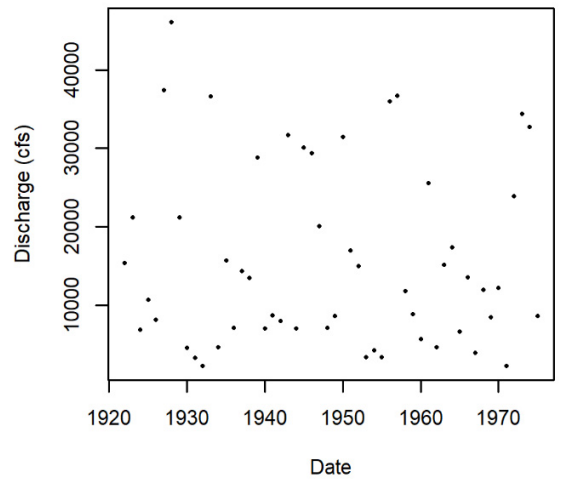

**Seasonal Maximum Discharge**  
**Station: 7067000**

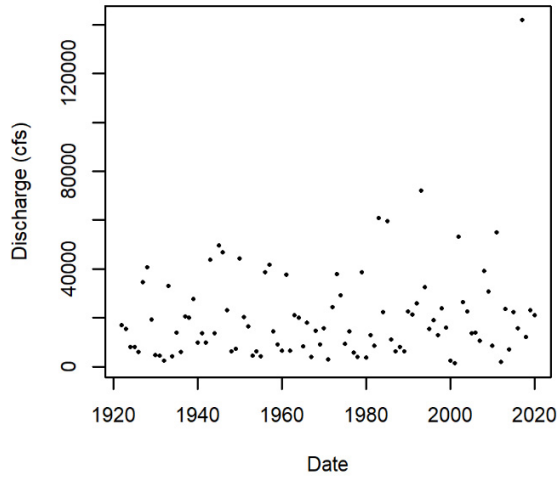

**Seasonal Maximum Discharge**  
**Station: 7068000**

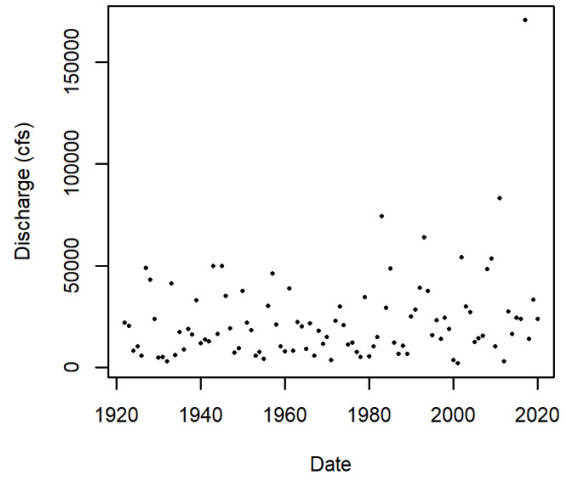

**Seasonal Maximum Discharge**  
**Station: 7069220**

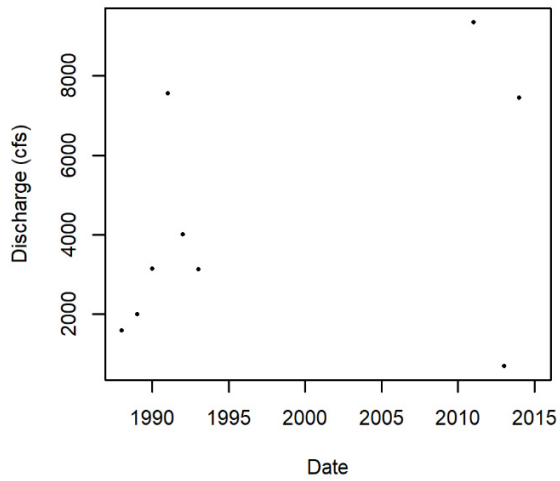

**Seasonal Maximum Discharge**  
**Station: 7069295**

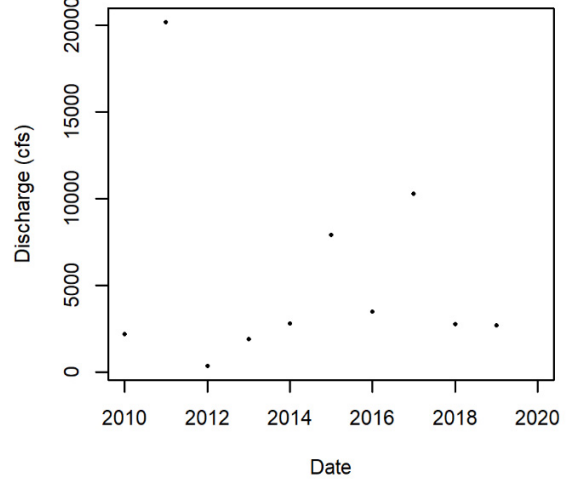

**Seasonal Maximum Discharge**  
**Station: 7069305**

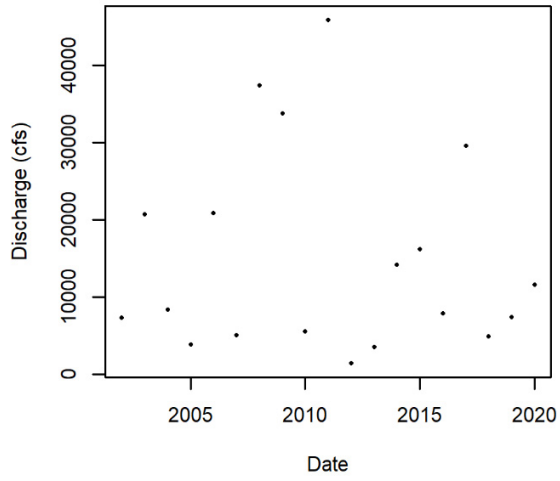

**Seasonal Maximum Discharge**  
**Station: 7069500**

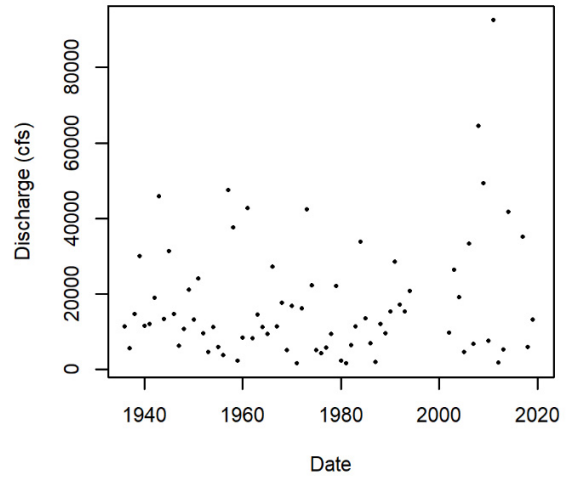

**Seasonal Maximum Discharge**  
**Station: 7070000**

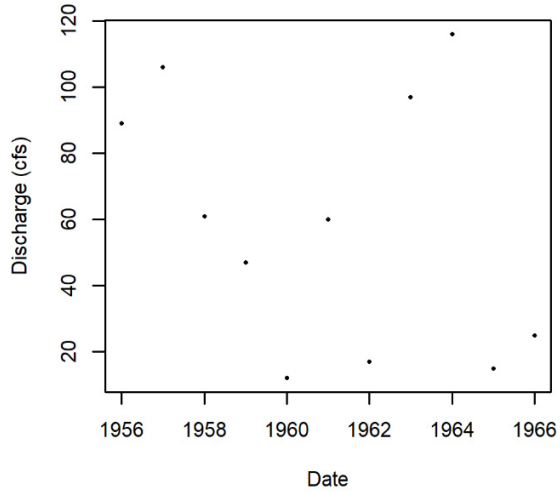

**Seasonal Maximum Discharge**  
**Station: 7070500**

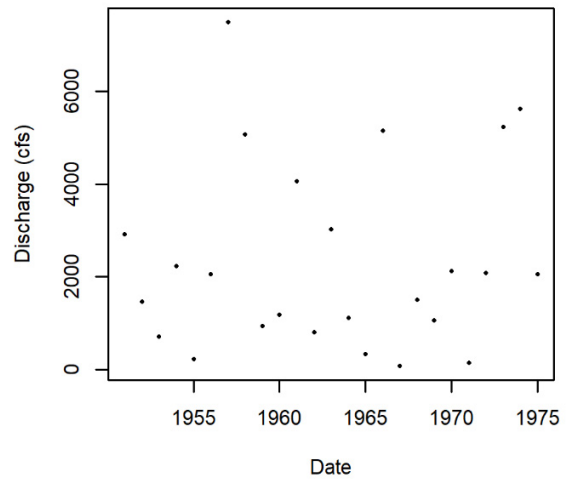

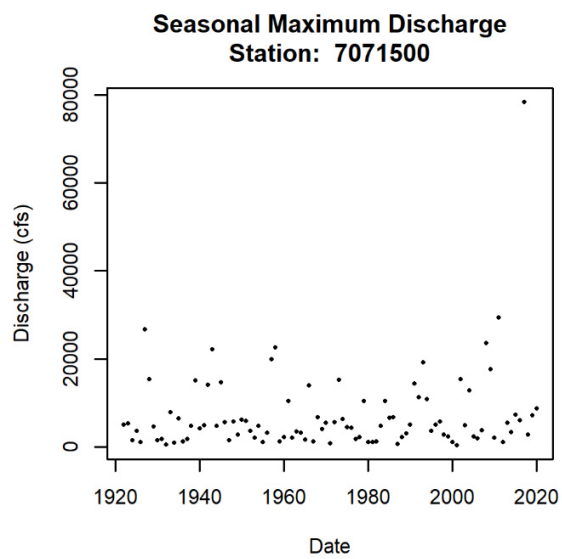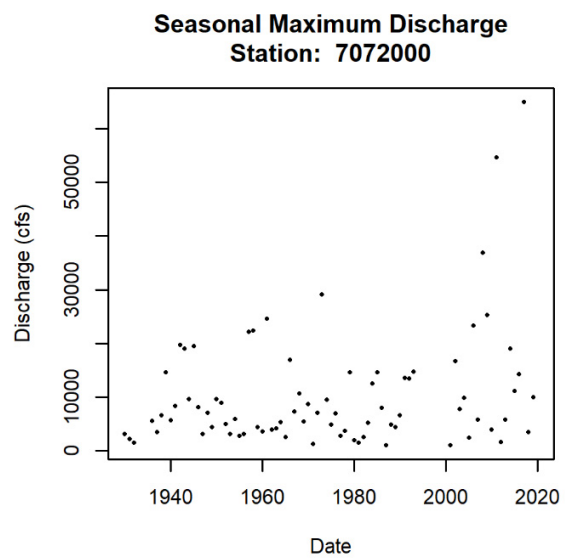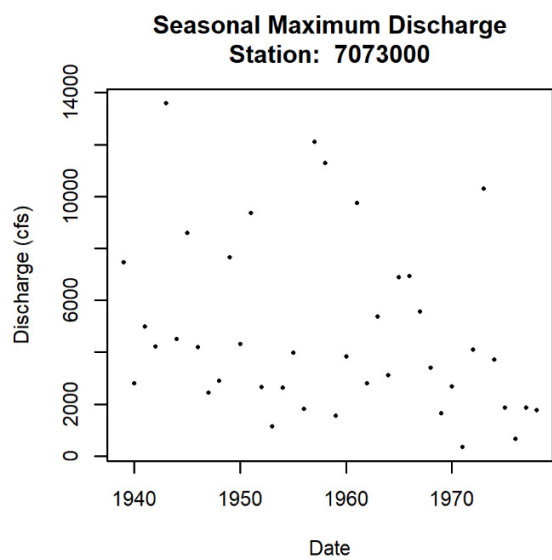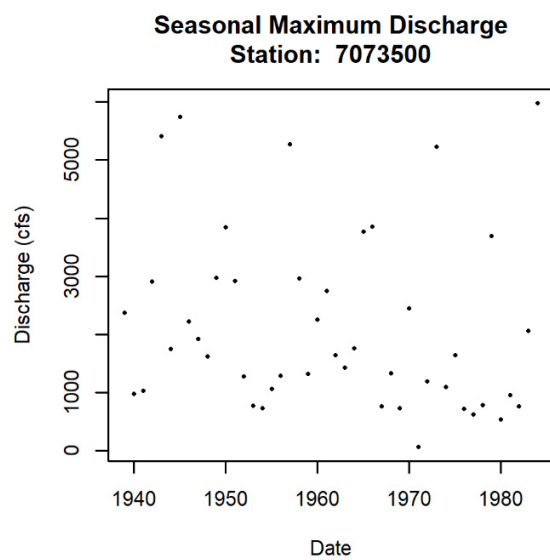

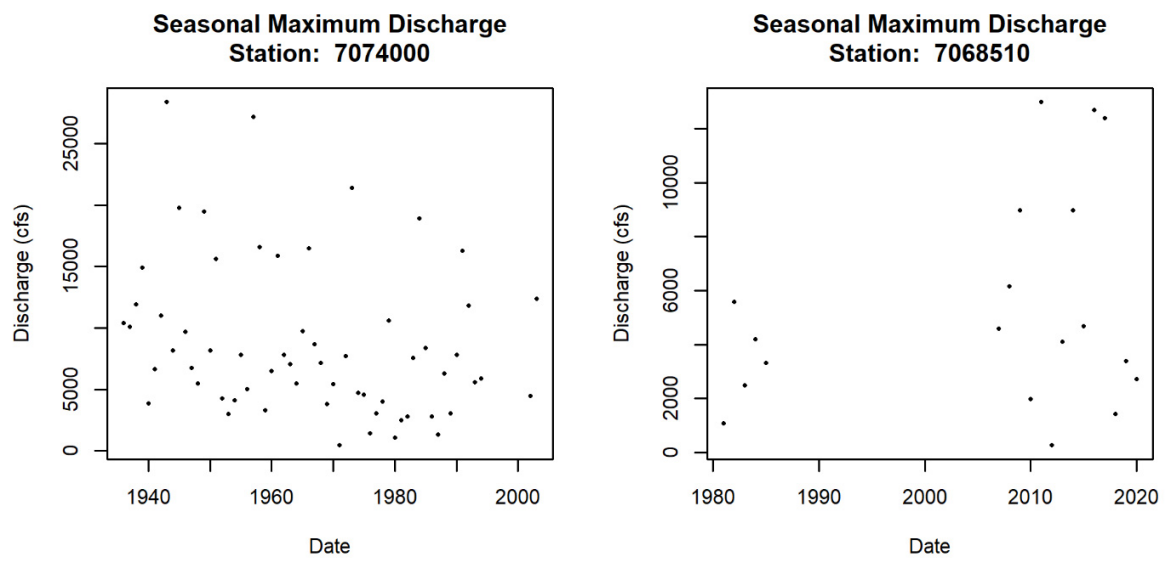

Figure S3. Annual maxima of the seasonal (April - November) mean daily discharge data at each of the 22 stations.

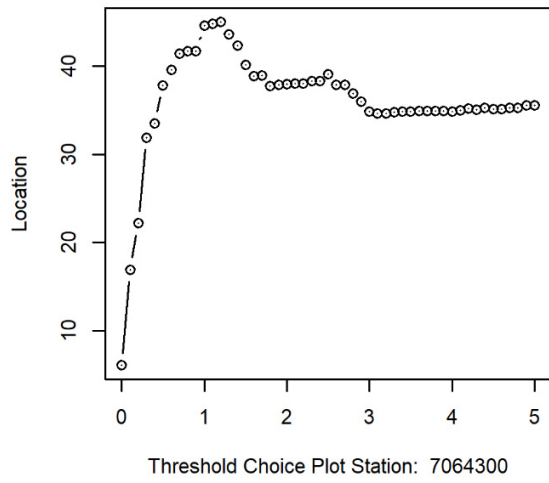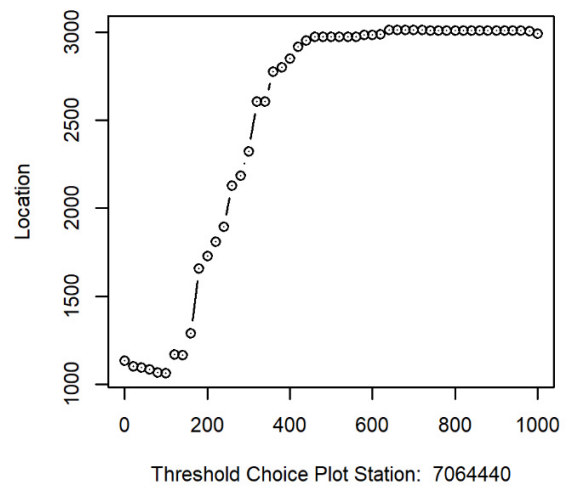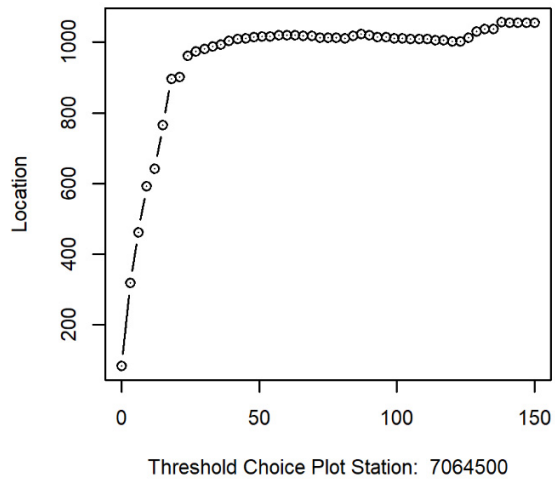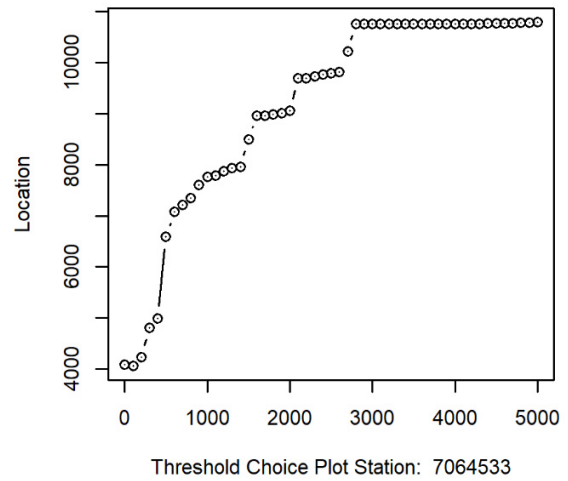

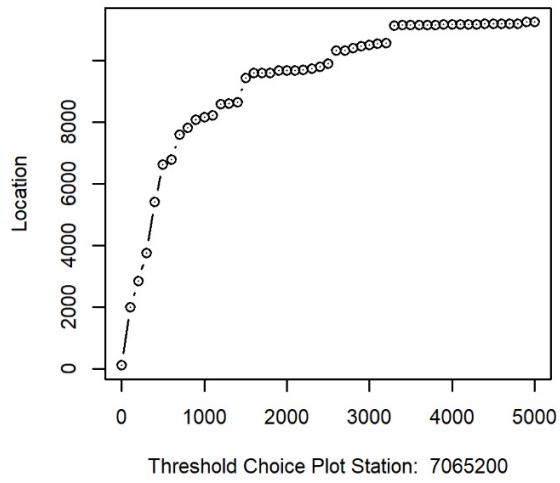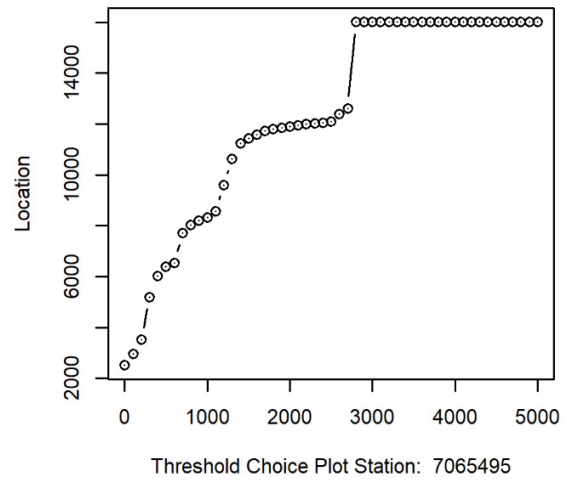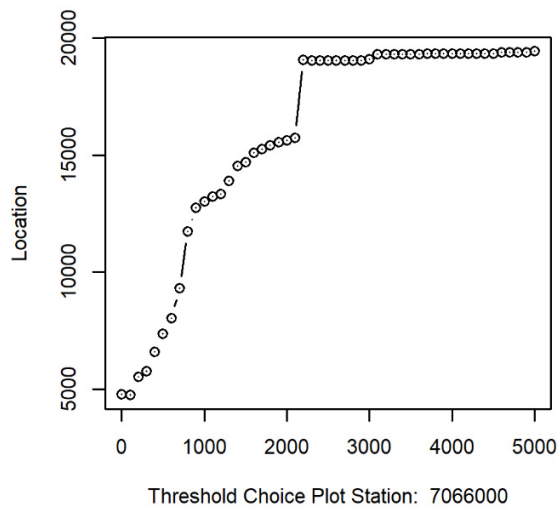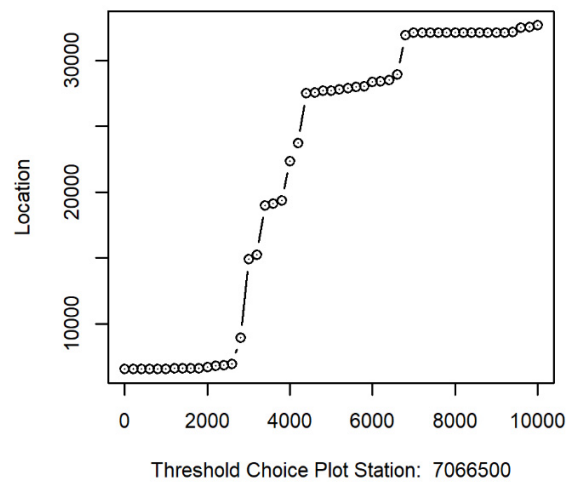



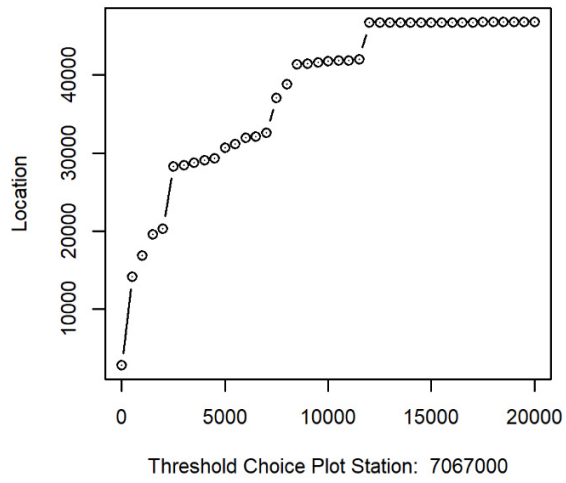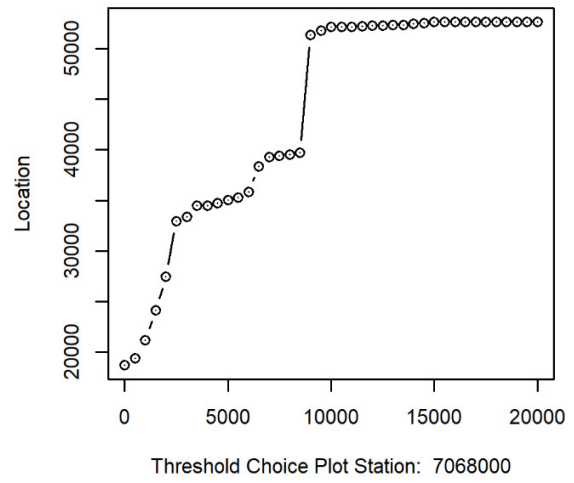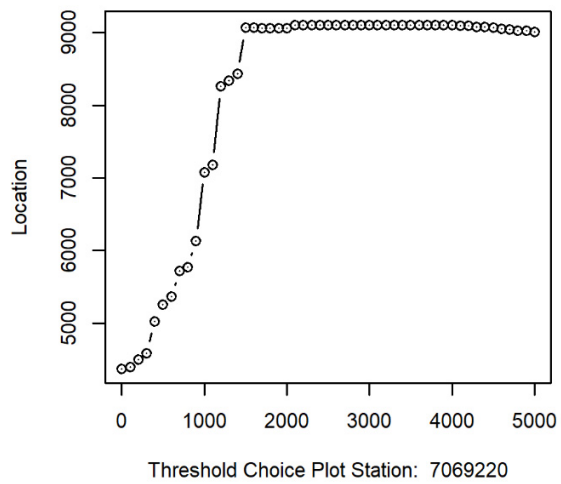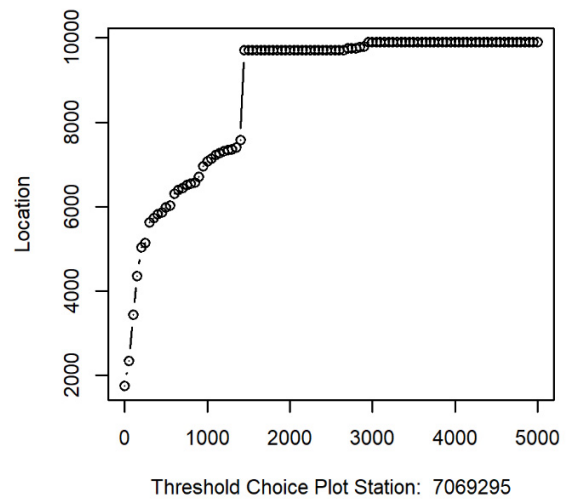

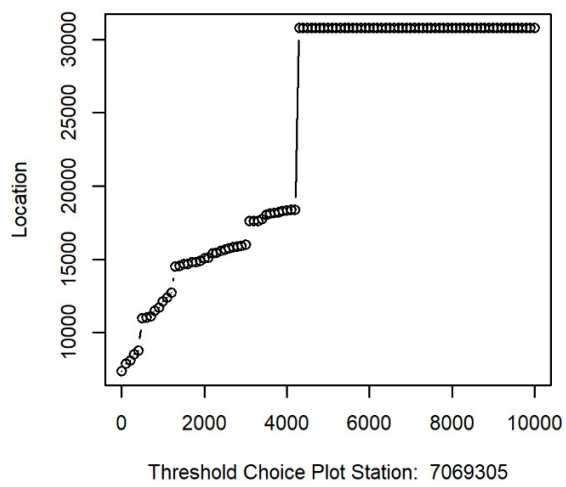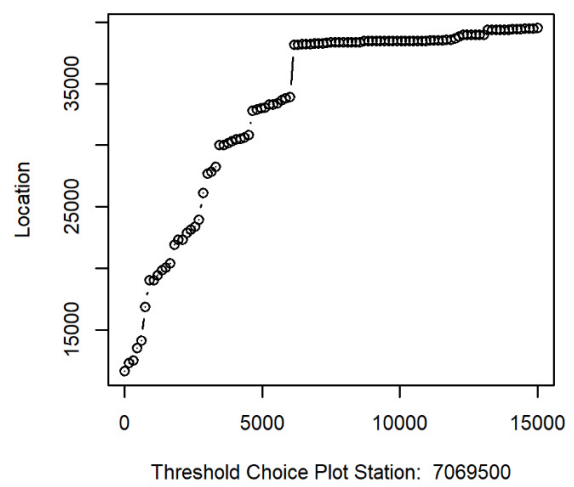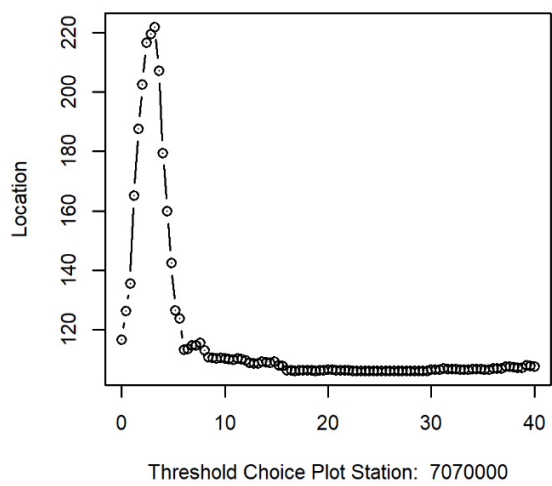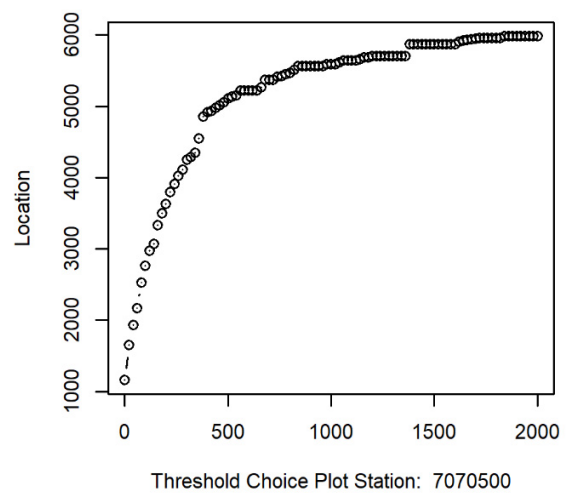

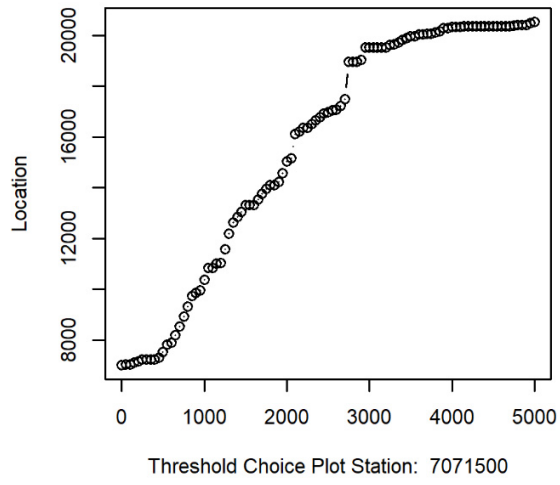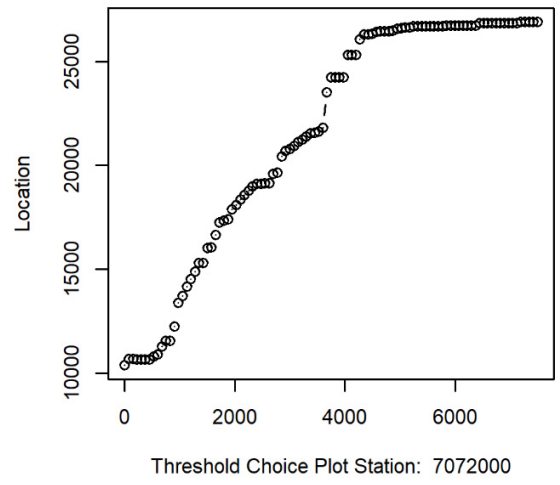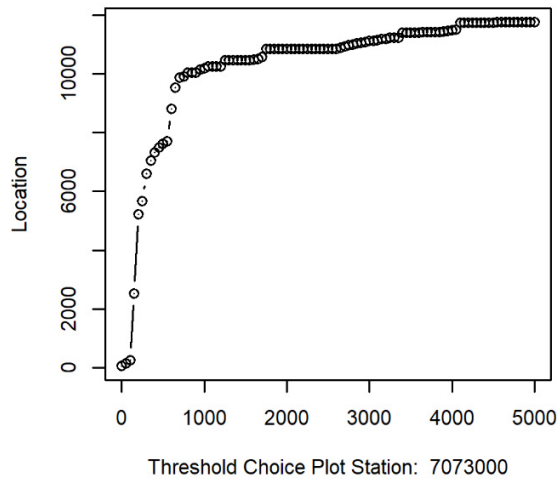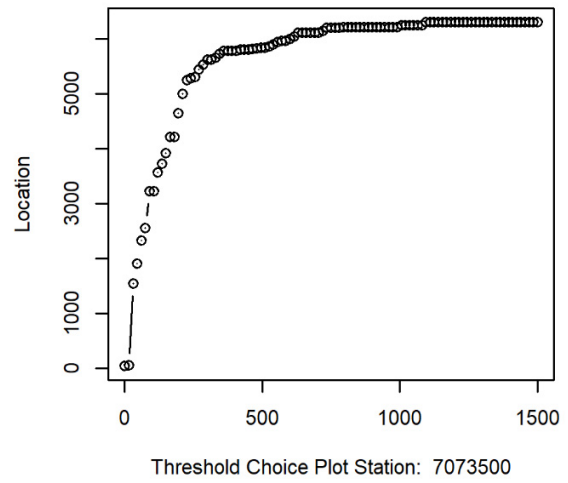

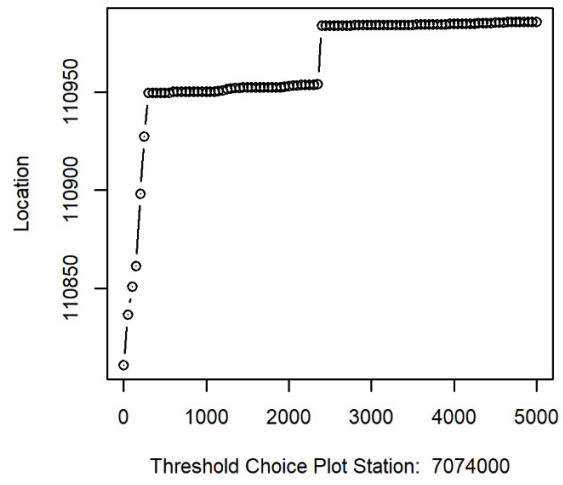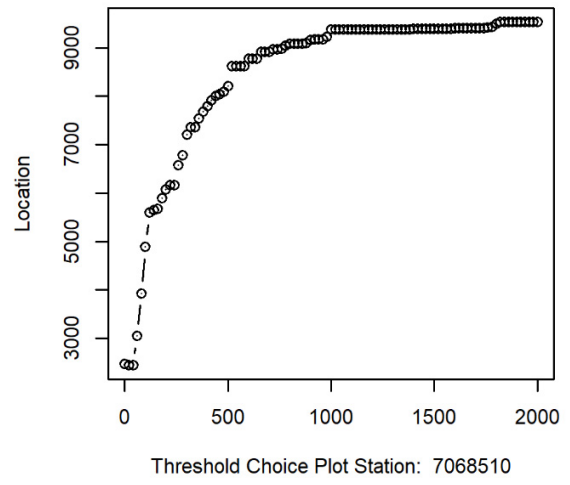

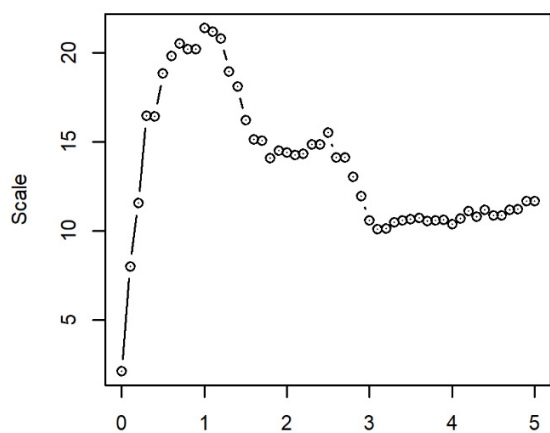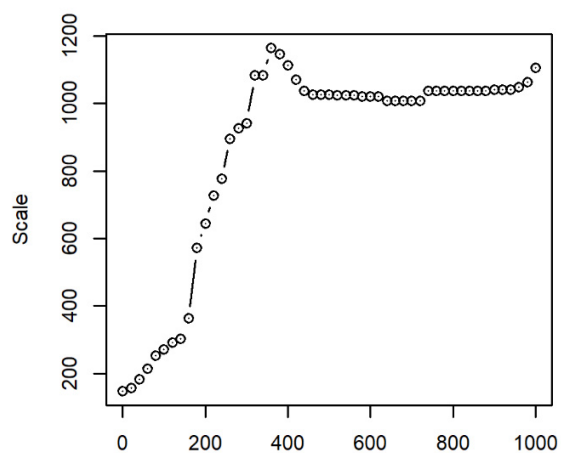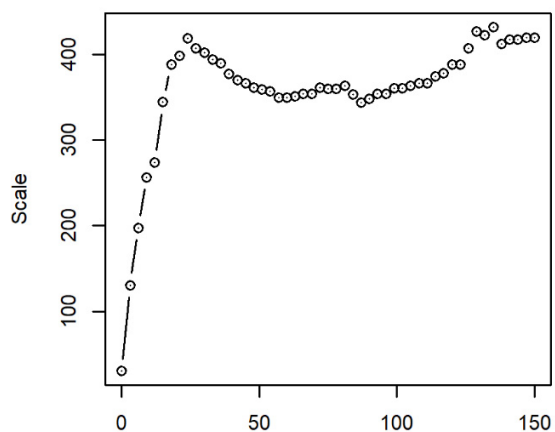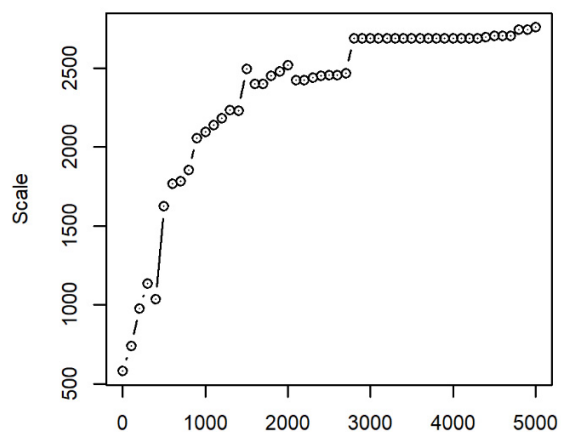

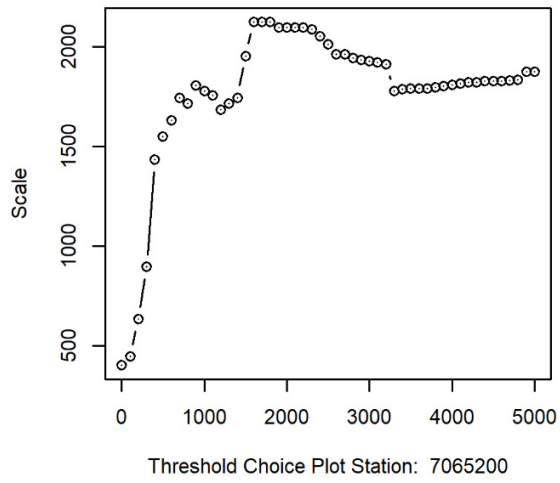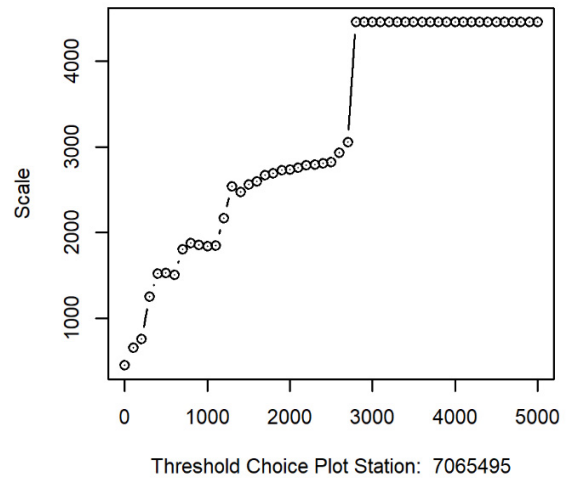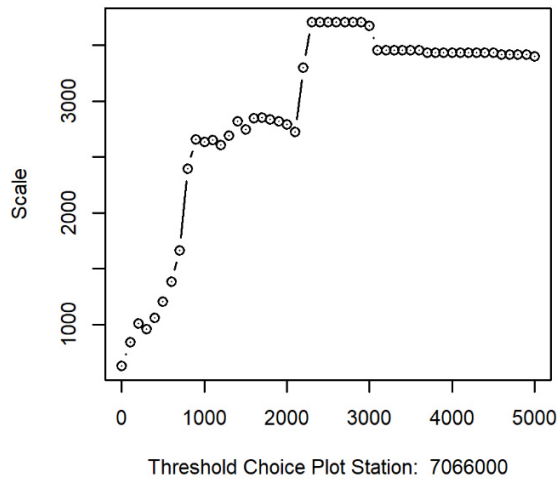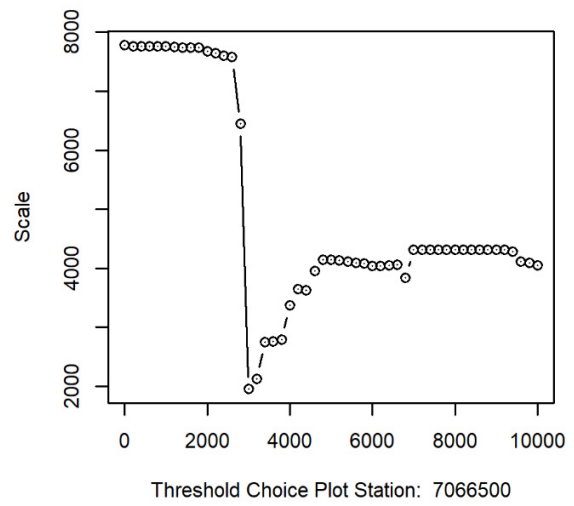

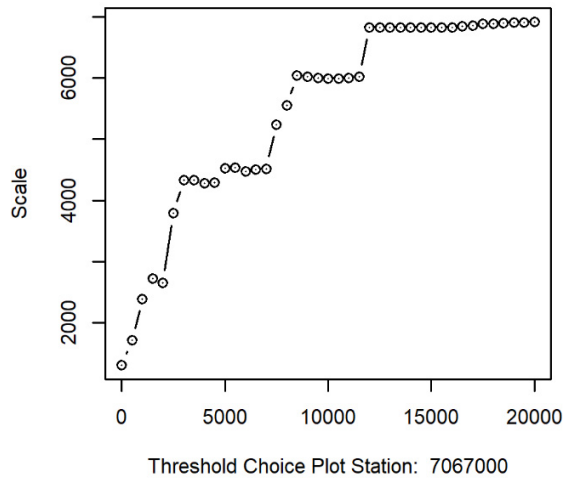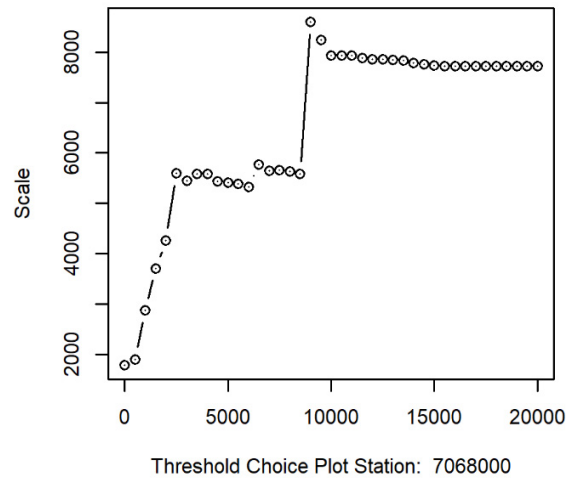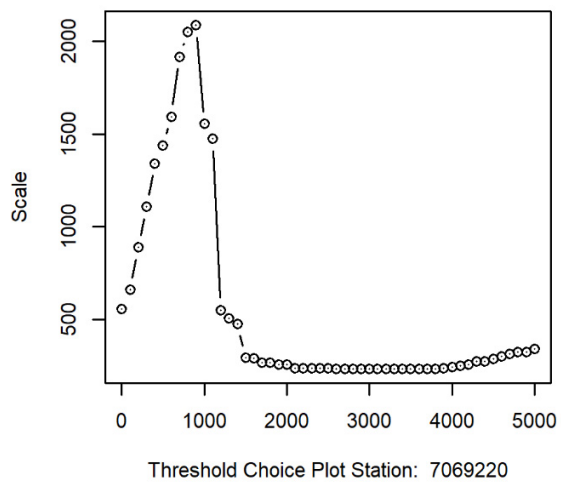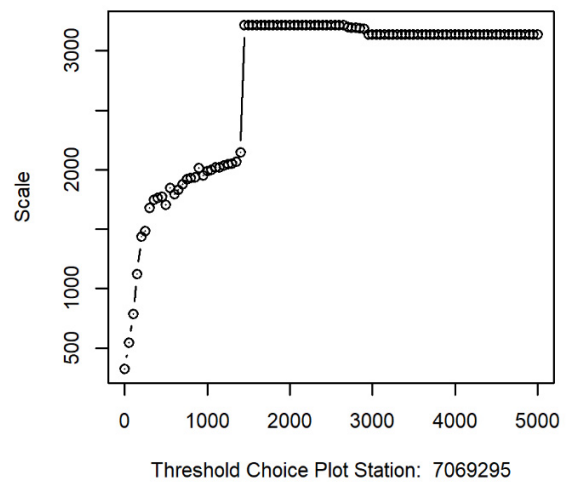

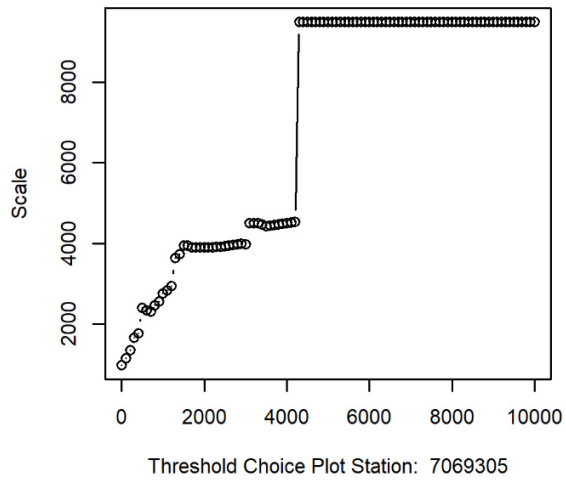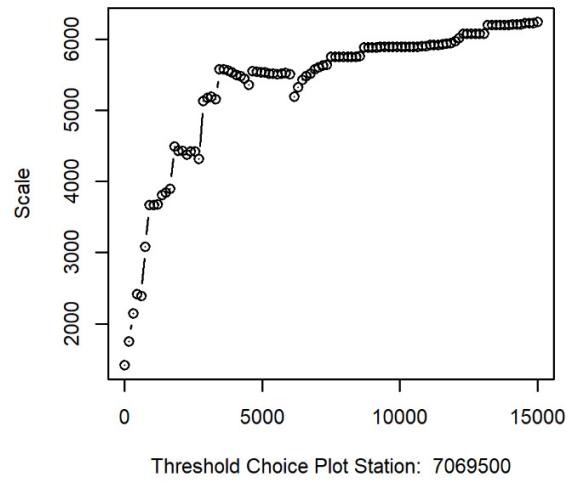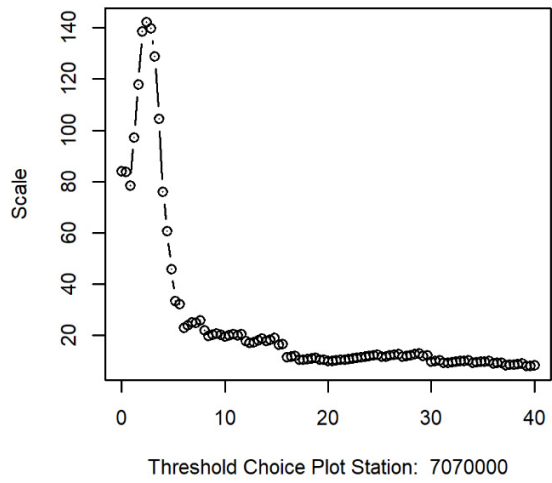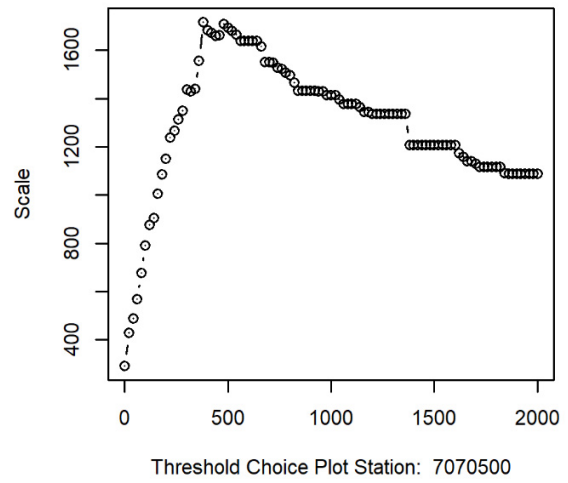



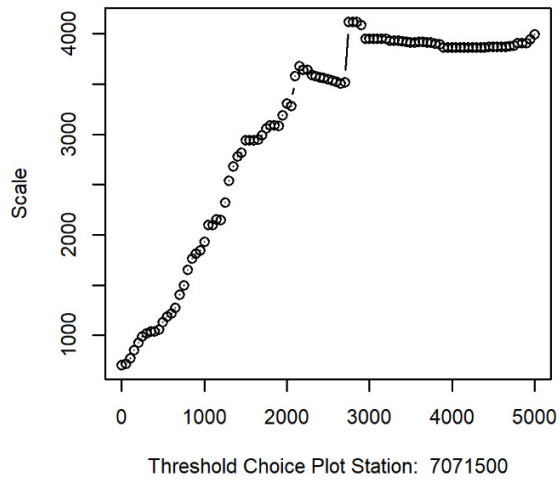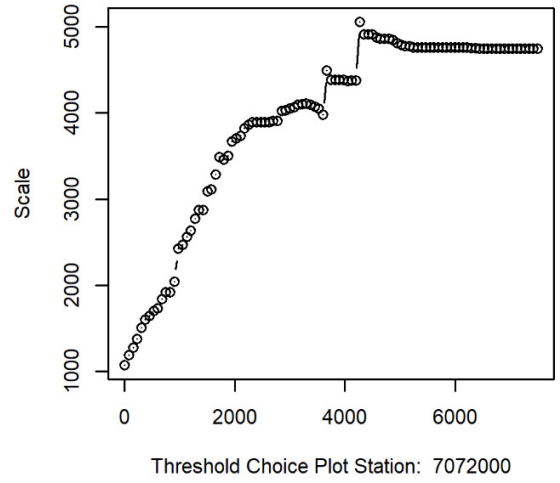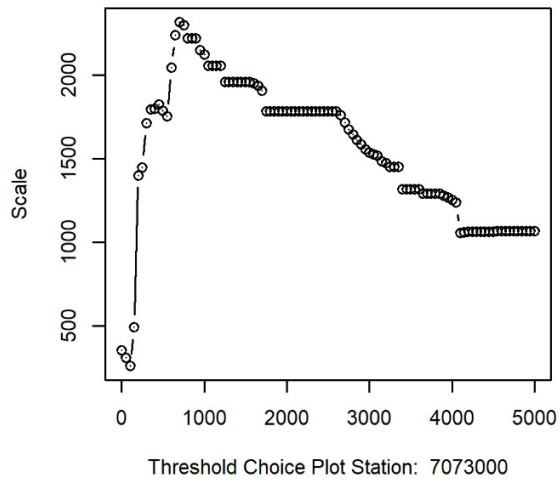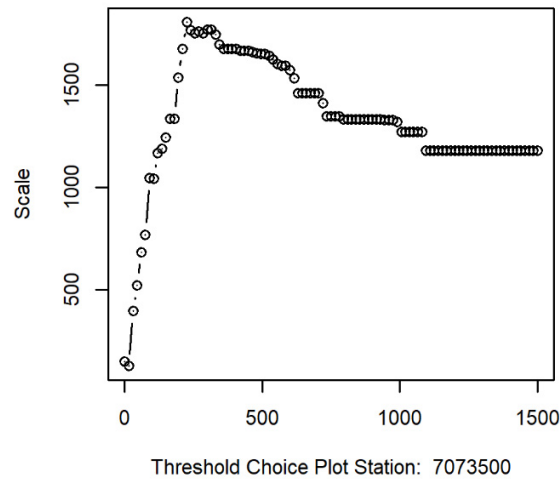

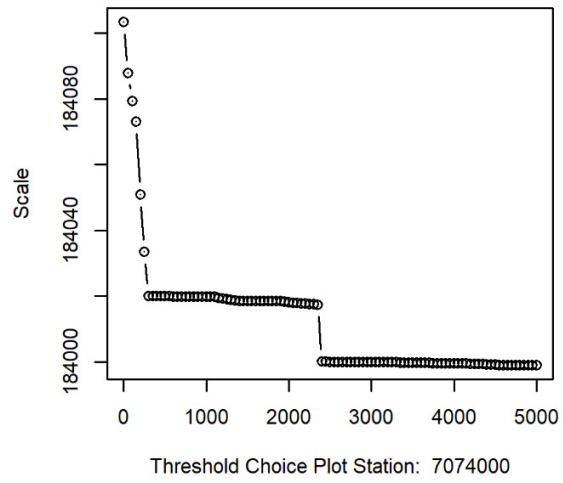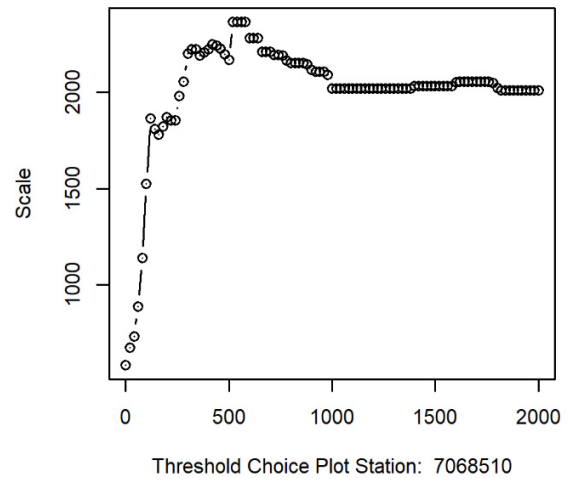

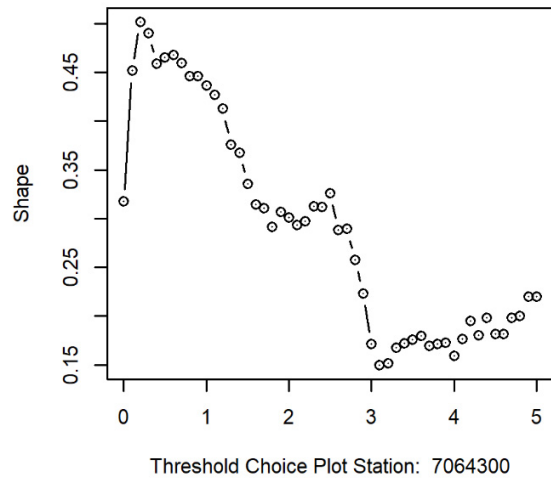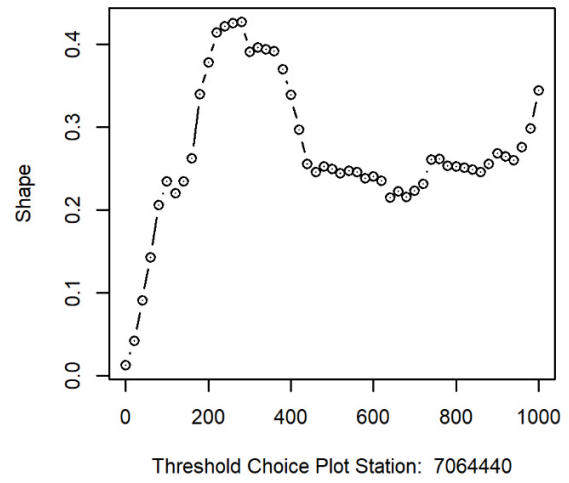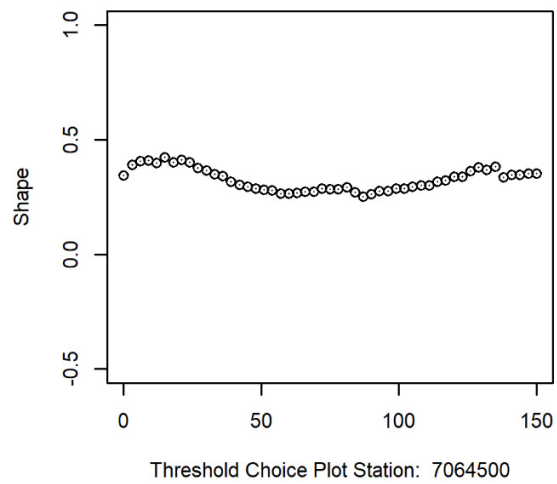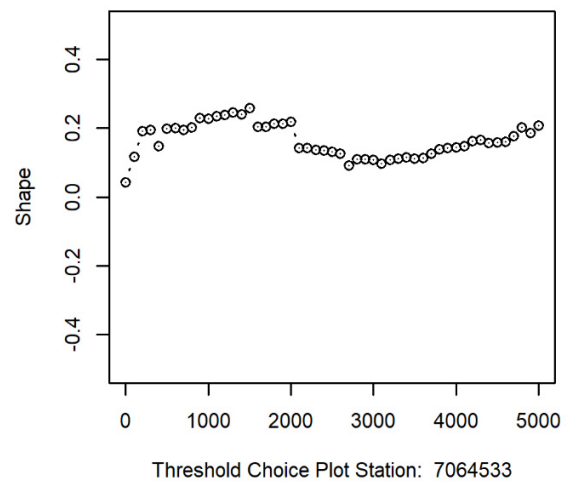

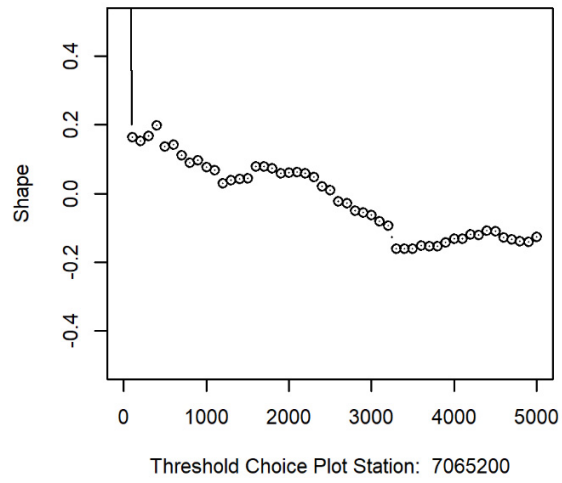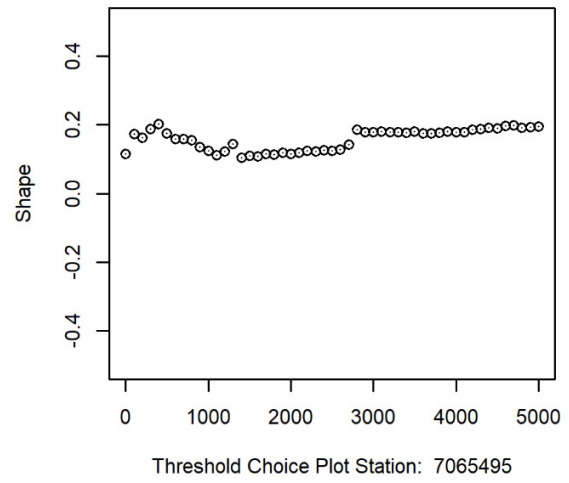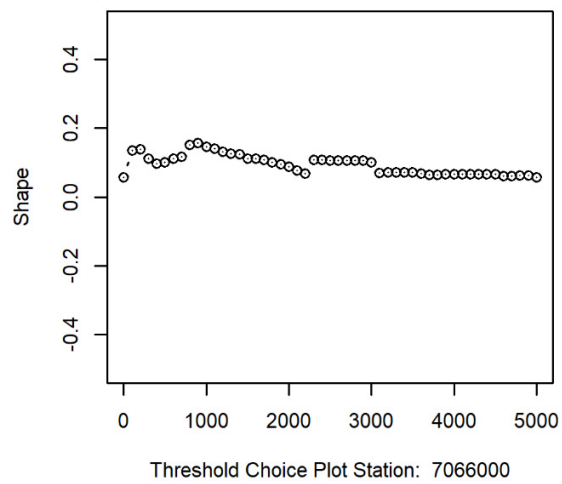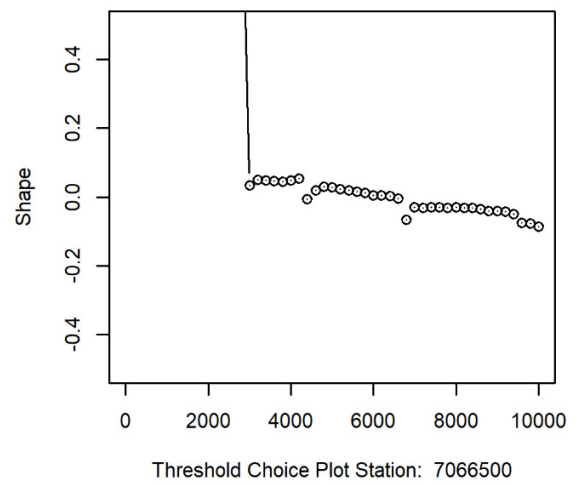

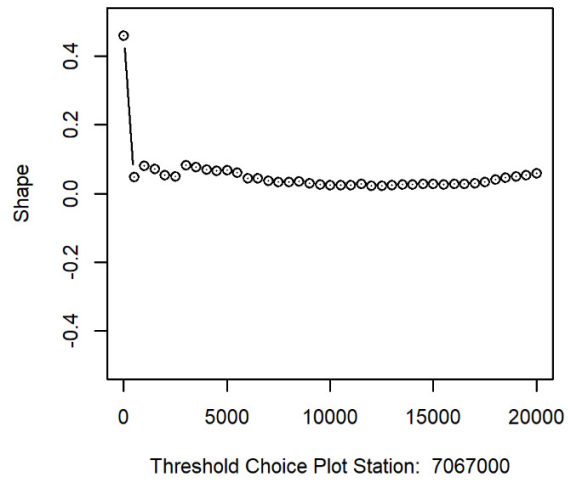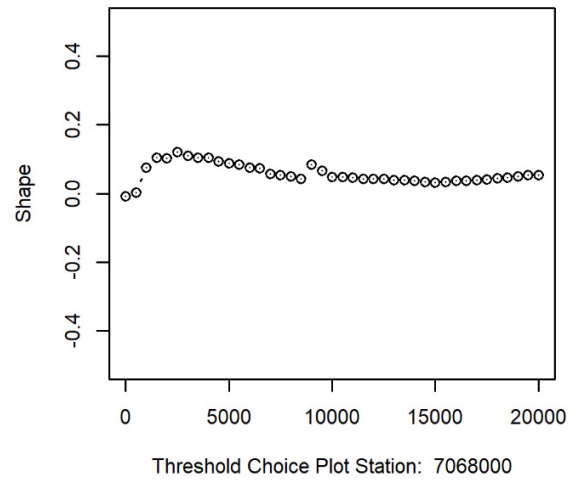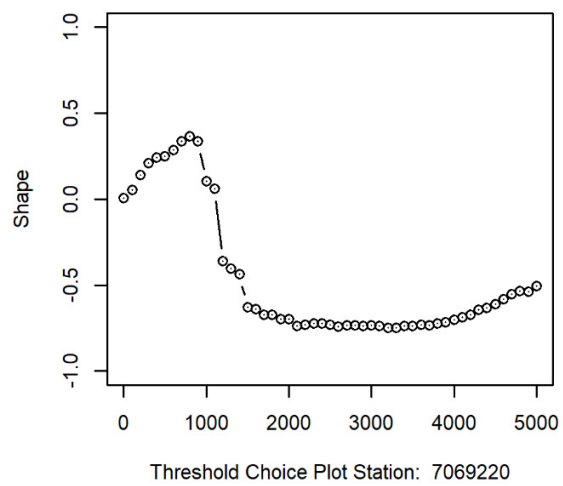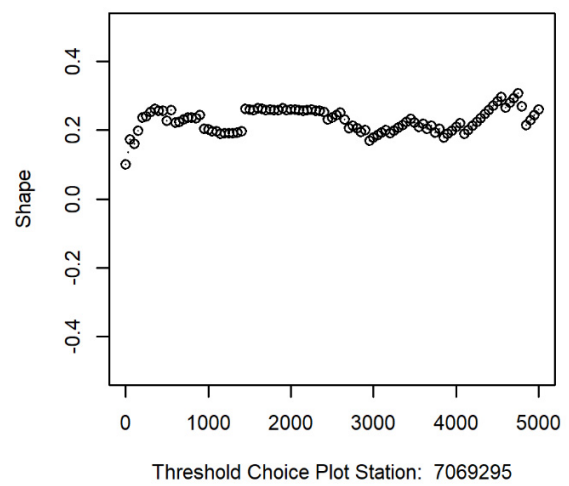

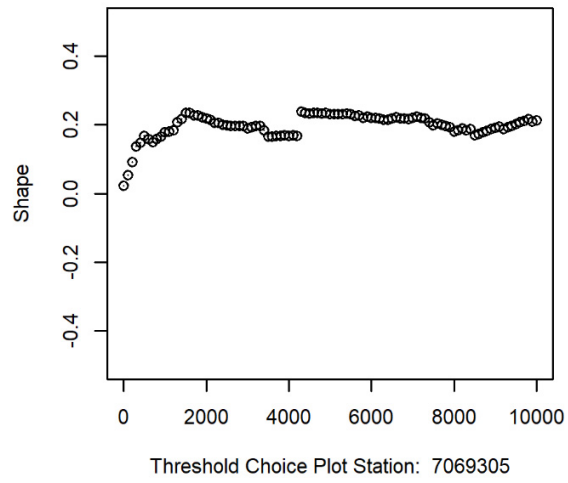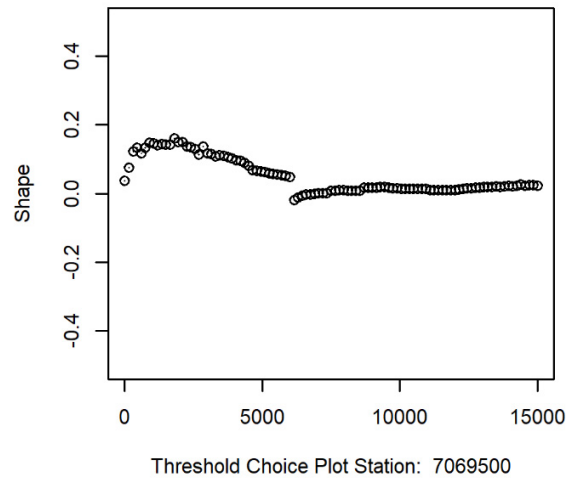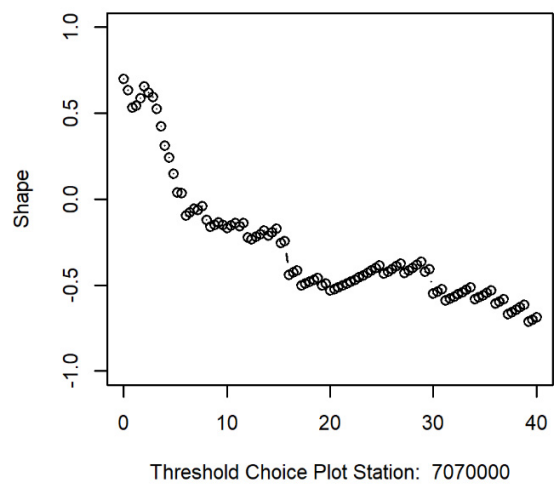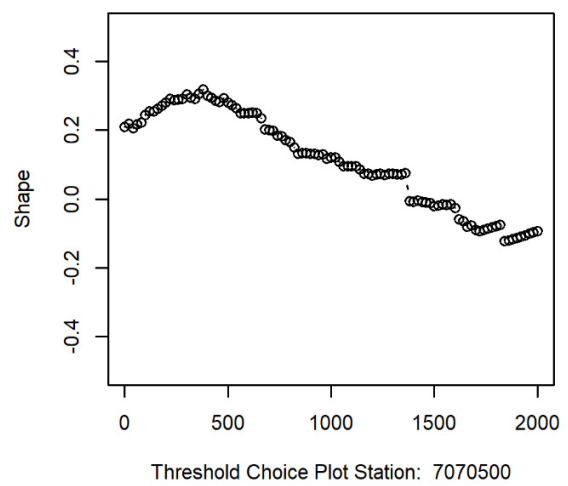

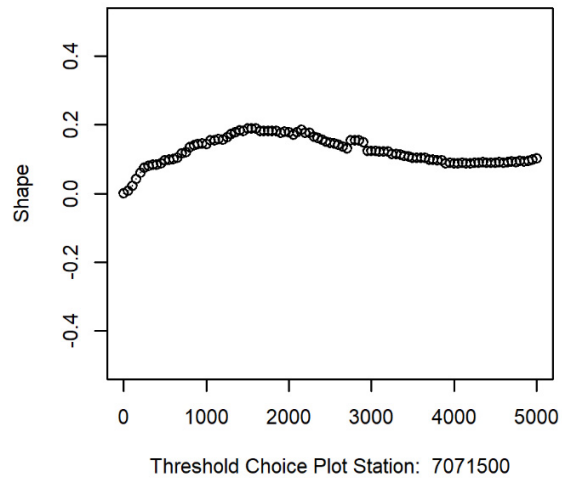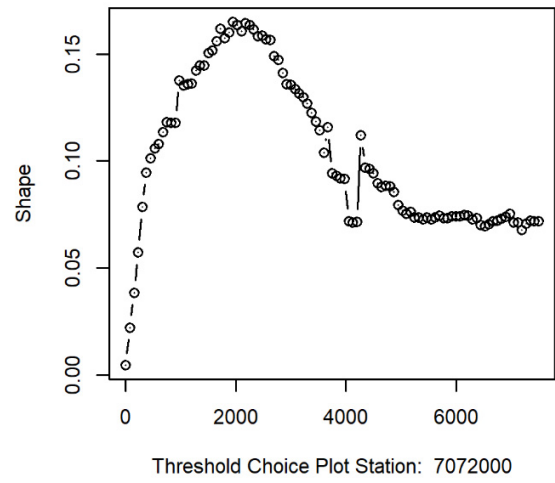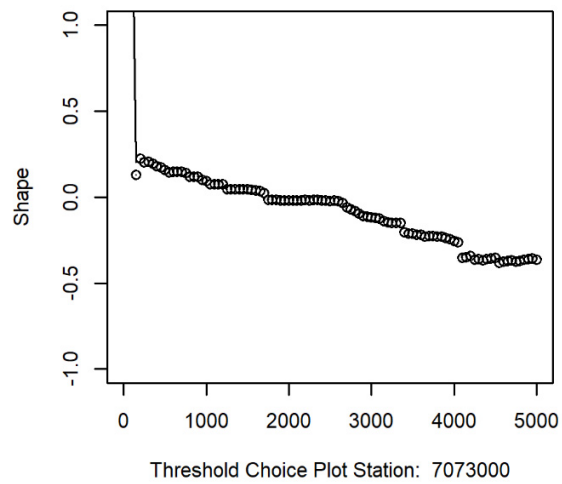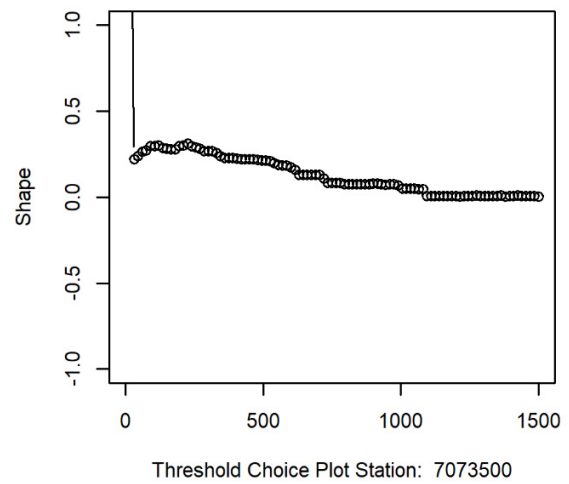

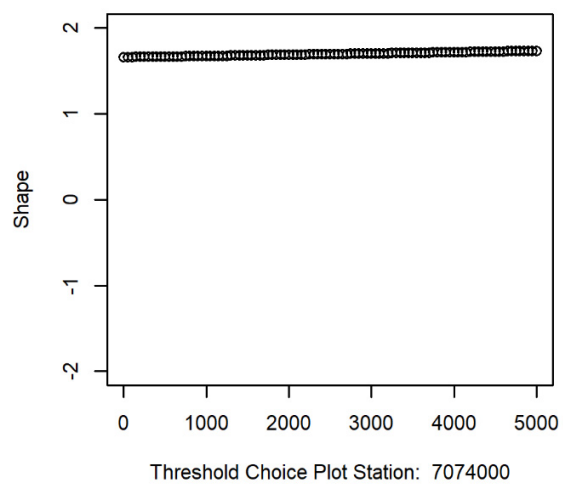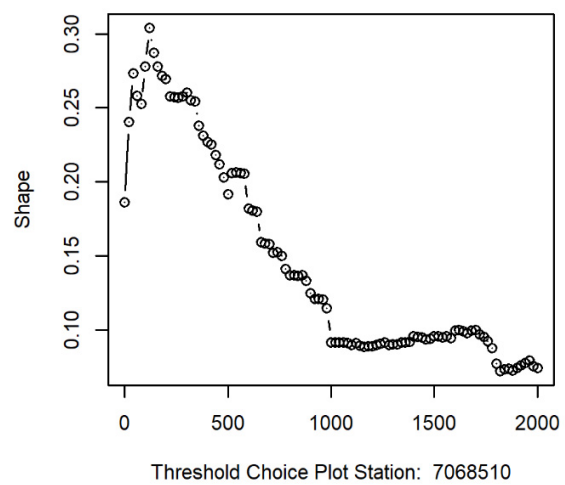

Figure S4. Threshold choice plots (Location, Scale, Shape).



| Covariate Values |         |          |           |       |          |           |       |              |           |             |         |             |             |             |             |             |                    |      |
|------------------|---------|----------|-----------|-------|----------|-----------|-------|--------------|-----------|-------------|---------|-------------|-------------|-------------|-------------|-------------|--------------------|------|
| Index            | StaNU   | Outlet   |           |       | Centroid |           |       | Area         | Perimeter | Ave. length |         | Ave. width  |             | Elevation   |             |             | Land surface slope |      |
|                  |         | X        | Y         | Z     | X        | Y         | Z     |              |           |             |         |             |             | Mean        | Minimum     | Maximum     | Range              | Mean |
| 1                | 7064300 | 611589.8 | 4154444.8 | 354.8 | 611390.8 | 4155950.2 | 399.9 | 4852409.4    | 15638.8   | 7139.8      | 679.6   | 389.3425749 | 355.5322876 | 420.6635742 | 65.13128662 | 4.452783273 | 4.288345337        |      |
| 2                | 7064440 | 617544.2 | 4145438.3 | 274.1 | 610210.2 | 4150871.8 | 373.0 | 155994503.4  | 87430.2   | 39795.2     | 3919.9  | 369.1341834 | 273.7368469 | 436.8686523 | 163.1318054 | 5.118374453 | 4.323289871        |      |
| 3                | 7064500 | 602008.9 | 4121330.2 | 366.2 | 600130.2 | 4120697.8 | 395.0 | 22084321.7   | 27420.3   | 11845.9     | 1864.3  | 410.166754  | 365.4928894 | 451.6830139 | 86.19012451 | 3.993072325 | 3.839711335        |      |
| 4                | 7064533 | 628133.0 | 4137533.1 | 239.9 | 612661.2 | 4137694.3 | 396.2 | 762570414.1  | 200175.3  | 91778.9     | 8308.8  | 365.3185486 | 234.6977997 | 455.0053406 | 220.3075409 | 6.368586243 | 4.71969223         |      |
| 5                | 7065200 | 618427.0 | 4101926.6 | 257.6 | 604513.1 | 4105876.0 | 357.5 | 479024277.6  | 156231.2  | 71407.2     | 6708.3  | 373.3943786 | 255.5171509 | 491.6122437 | 236.0950928 | 6.475366397 | 5.885503292        |      |
| 6                | 7065495 | 638263.7 | 4112443.8 | 200.9 | 612969.2 | 4105080.0 | 304.2 | 787519362.7  | 224306.7  | 104626.4    | 7527.0  | 353.3596305 | 201.0159149 | 491.6122437 | 290.5963287 | 6.637208907 | 5.459944725        |      |
| 7                | 7066000 | 645794.0 | 4113227.4 | 195.0 | 619582.3 | 4106105.7 | 364.3 | 1047402636.0 | 270375.4  | 126936.3    | 8251.4  | 337.9621096 | 188.5548706 | 491.6122437 | 303.057373  | 7.159622302 | 5.909494638        |      |
| 8                | 7066500 | 654599.1 | 4116692.5 | 174.3 | 626571.9 | 4125280.3 | 356.8 | 3317714319.0 | 424879.7  | 195466.5    | 16973.3 | 339.5245426 | 173.348587  | 491.6122437 | 318.2636566 | 7.566663326 | 6.128806353        |      |
| 9                | 7067000 | 676780.8 | 4095761.5 | 136.4 | 635165.1 | 4120591.9 | 347.4 | 4327848902.0 | 513727.5  | 238735.5    | 18128.2 | 319.6302101 | 135.4850922 | 491.6122437 | 356.1271515 | 7.8236497   | 6.550452948        |      |
| 10               | 7068000 | 692478.2 | 4055092.1 | 113.4 | 643295.4 | 4112701.9 | 258.5 | 5310353320.0 | 661027.8  | 313579.2    | 16934.6 | 297.9379478 | 101.7503433 | 491.6122437 | 389.8619003 | 7.830546402 | 6.605077267        |      |
| 11               | 7069220 | 632016.4 | 4036010.8 | 137.7 | 620144.6 | 4056675.5 | 257.2 | 672741878.7  | 214576.0  | 100600.8    | 6687.2  | 266.5075311 | 137.6114044 | 383.3500061 | 245.7386017 | 4.251898852 | 3.80403471         |      |
| 12               | 7069295 | 622602.9 | 4023882.8 | 150.3 | 603732.0 | 4036574.7 | 238.3 | 684568595.4  | 213586.4  | 99943.7     | 6849.5  | 257.6040073 | 142.9076233 | 376.0560303 | 233.148407  | 4.141315439 | 3.649635434        |      |
| 13               | 7069305 | 636205.0 | 4019801.5 | 110.2 | 615912.1 | 4042438.1 | 228.9 | 2186654640.0 | 316205.6  | 142788.9    | 15313.9 | 245.2942225 | 105.3000031 | 383.3500061 | 278.0500031 | 4.630908797 | 4.096528292        |      |
| 14               | 7069500 | 664363.1 | 4008297.3 | 79.5  | 624933.4 | 4036776.8 | 177.4 | 3006327172.0 | 406025.3  | 186930.0    | 16082.6 | 226.7603634 | 79.24617004 | 383.3500061 | 304.1038361 | 5.068974067 | 4.417634487        |      |
| 15               | 7070000 | 595458.7 | 4092124.8 | 358.6 | 596524.7 | 4095390.2 | 387.7 | 12681016.9   | 21972.5   | 9675.7      | 1310.6  | 398.0314067 | 358.7879333 | 465.5922241 | 106.8042908 | 4.288597611 | 4.115372658        |      |
| 16               | 7070500 | 634562.6 | 4072051.9 | 184.1 | 612011.6 | 4080804.5 | 307.7 | 926783615.8  | 226819.9  | 104545.0    | 8864.9  | 322.111387  | 184.0690308 | 465.5922241 | 281.5231934 | 4.678710085 | 3.647809267        |      |
| 17               | 7071500 | 660823.9 | 4057409.6 | 131.2 | 629904.9 | 4079710.3 | 294.4 | 2031517351.0 | 358550.0  | 167118.9    | 12156.1 | 290.9596479 | 125.1460648 | 465.5922241 | 340.4461594 | 5.505137601 | 4.052299738        |      |
| 18               | 7072000 | 669228.5 | 4024020.1 | 93.6  | 637395.5 | 4070067.2 | 272.3 | 2895490614.0 | 452346.0  | 212550.4    | 13622.6 | 260.9710692 | 91.14718628 | 465.5922241 | 374.4450378 | 5.341363113 | 4.190588474        |      |
| 19               | 7073000 | 625274.6 | 3995813.3 | 128.2 | 607252.0 | 4010216.1 | 180.5 | 558103827.4  | 185781.5  | 86433.7     | 6457.0  | 222.5466628 | 125.1315689 | 309.6742859 | 184.542717  | 4.196548588 | 3.702542067        |      |
| 20               | 7073500 | 625078.6 | 3993776.4 | 129.5 | 611303.0 | 3993841.5 | 210.5 | 258269807.5  | 128363.5  | 59867.7     | 4314.0  | 206.5203669 | 129.4501953 | 279.3615112 | 149.9113159 | 3.905611516 | 3.455980897        |      |
| 21               | 7074000 | 639556.8 | 3997385.5 | 105.7 | 615473.8 | 4003883.9 | 174.2 | 1223508109.0 | 260923.4  | 120290.4    | 10171.3 | 203.3214692 | 90.8863373  | 309.6742859 | 218.7856522 | 4.307106204 | 3.728960991        |      |
| 22               | 7068510 | 716797.2 | 4056751.3 | 92.0  | 702951.3 | 4070964.0 | 171.4 | 503704035.2  | 188553.6  | 88591.1     | 5685.7  | 172.1296232 | 91.81044769 | 268.3520813 | 176.5416336 | 4.009394854 | 3.247873306        |      |

Table S1. Covariate values.
